# Supplementary material
Source: publisher figshare collection journal article supplement (https://geolsoc.figshare.com/ndownloader/files/25488539)
Supplement: Supplementary file 1 [file 25488539]

## Sheet: Standards
Standard Name	Analytical Session	Ns	Area (µm2)	238U (ppm)	238U 1σ	Age (Ma)	1σ Error			*table definitions: Standard Name = apatite standard material analysed for zeta calibration calculation; Analytical Session = LA-ICP-MS session in which samples and corresponding standards were analysed; Ns = number of spontaneous fisison tracks counted in region of interest; Area (µm2) = surface area of region of interest, expressed µm^2; 238U (ppm) = concentration of 238-U in analysed spot, exp…
Durango	LA-a	10	4273	14.31	0.33	31.5	9.99
Durango	LA-a	32	9763	14.17	0.34	44.51	7.94
Durango	LA-a	25	8384	14.34	0.24	40.03	8.03
Durango	LA-a	20	7755	14.49	0.32	34.28	7.7
Durango	LA-a	29	10720	12.02	0.3	43.31	8.12
Durango	LA-a	12	7785	11.53	0.28	25.76	7.46
Durango	LA-a	18	10810	11.64	0.28	27.56	6.53
Durango	LA-a	21	8524	11.76	0.29	40.33	8.86
Durango	LA-a	28	12550	12.02	0.27	35.74	6.8
Durango	LA-a	33	15900	12.13	0.31	32.96	5.8
Durango	LA-a	39	16970	11.81	0.28	37.47	6.06
Durango	LA-a	32	16650	11.53	0.27	32.11	5.73
Durango	LA-a	30	15540	11.75	0.26	31.65	5.82
Durango	LA-a	41	15030	11.77	0.3	44.6	7.06
Durango	LA-a	27	12130	14.38	0.41	29.82	5.8
Durango	LA-a	45	16570	14.54	0.32	35.97	5.42
Durango	LA-a	24	10130	14.32	0.34	31.87	6.55
Durango	LA-a	10	6221	14.39	0.28	21.53	6.82
Durango	LA-a	43	16590	14.35	0.3	34.78	5.35
Durango	LA-a	38	17360	14.18	0.35	29.74	4.88
Durango	LA-a	40	17260	13.98	0.32	31.93	5.1
Durango	LA-a	44	22920	11.88	0.29	31.13	4.75
Durango	LA-a	27	15050	11.9	0.28	29.05	5.63
Durango	LA-a	34	17960	11.76	0.28	31.01	5.37
Durango	LA-a	33	18620	11.77	0.25	29.01	5.09
Durango	LA-a	42	21260	11.57	0.25	32.89	5.12
Durango	LA-a	34	18360	11.71	0.27	30.46	5.27
Durango	LA-a	17	9829	11.6	0.3	28.73	7.01
Durango	LA-a	28	15840	11.44	0.31	29.77	5.68
Durango	LA-b	28	12070	10.71	0.22	41.69	7.93
Durango	LA-b	31	10900	10.87	0.28	50.33	9.13
Durango	LA-b	29	14310	10.03	0.27	38.9	7.3
Durango	LA-b	34	21360	10.52	0.26	29.15	5.05
Durango	LA-b	25	17290	10.94	0.26	25.47	5.13
Durango	LA-b	17	11890	10.69	0.25	25.77	6.28
Durango	LA-b	18	9179	11.01	0.32	34.3	8.15
Durango	LA-b	21	13800	11.72	0.23	25.02	5.48
Durango	LA-b	13	7330	11.86	0.23	28.81	8.01
Durango	LA-b	30	13660	11.55	0.31	36.61	6.76
Durango	LA-b	32	13260	11.21	0.28	41.44	7.4
Durango	LA-b	24	11740	10.9	0.25	36.11	7.42
Durango	LA-b	21	8744	11.29	0.29	40.95	9
Durango	LA-b	24	11500	11.04	0.24	36.4	7.47
Durango	LA-b	16	8323	11.4	0.29	32.48	8.16
Durango	LA-b	15	9592	11.38	0.29	26.48	6.87

## Sheet: Unknowns
Grain No.	Analytical Session	Ns	Area (µm2)	238U (ppm)	238U 1σ	Age (Ma)	1σ Error	Dpar (µm)	rmr0	Cl (wt%)	Effective Cl (apfu)			*table definitions: Grain No. = apatite grain analysed; Analytical Session = LA-ICP-MS session in which samples and corresponding standards were analysed; Ns = number of spontaneous fisison tracks counted in region of interest; Area (µm2) = surface area of region of interest, expressed µm^2; 238U (ppm) = concentration of 238-U in analysed spot, expressed as parts per million; 238U 1σ = one-sigma …
CS-1_2	LA-a	171	2640	53.8	1	220.8	19.6	2.48	0.837128	0.216531	0.00911573
CS-1_3	LA-a	111	2403	29.37	0.69	287	30.4	2.52	0.826074	0.169149	0.0402814
CS-1_4	LA-a	93	1654	28.85	0.82	353.8	40.7	2.4	0.833224	0.246948	0.0203602
CS-1_5	LA-a	63	1266	26.07	0.67	346.7	46.8	2.7	0.817524	0.275574	0.0630593
CS-1_6	LA-a	117	3093	20.66	0.55	332.9	34.8	2.61	0.82476	0.247292	0.0438532
CS-1_7	LA-a	92	1781	21.6	0.61	431.5	49.8	2.71	0.819117	0.297777	0.0588972
CS-1_8	LA-a	191	4129	20.08	0.63	416.2	37	2.35	0.828548	0.218183	0.0334819
CS-1_9	LA-a	189	2506	35.43	0.77	385.5	33.2	2.45	0.839084	0.260534	0.00338357
CS-1_10	LA-a	171	2291	43.9	1.4	309.7	28.6	2.46	0.831511	0.285064	0.0252094
CS-1_11	LA-a	308	3421	68.1	1.2	242.1	17.5	2.58	0.835901	0.244842	0.0126801
CS-1_12	LA-a	144	2335	47.1	1.1	239.8	23	2.46	0.832155	0.190045	0.0233925
CS-1_13	LA-a	191	3028	34.65	0.73	331.1	28.4	2.55	0.825472	0.317766	0.0419213
CS-1_14	LA-a	493	7607	44.4	1.3	266.8	18	2.41	0.836196	0.217499	0.0118261
CS-1_15	LA-a	80	1397	35.5	1.3	294.2	36.6	2.79	0.820461	0.288157	0.0553571
CS-1_18	LA-a	125	2131	29.31	0.64	363	36.6	2.5	0.830045	0.261278	0.0293196
CS-1_19	LA-a	185	2381	42.2	1.2	334.7	29.7	2.53	0.835186	0.209619	0.0147418
CS-1_20	LA-a	121	1723	35.6	1	358	37.1	2.37	0.82792	0.205595	0.0352177
CS-1_21	LA-a	73	1652	30.5	1.3	264.8	34.7	2.24	0.827012	0.251622	0.0377148
CS-1_23	LA-a	212	3499	41.3	1.1	268.1	22.6	2.59	0.837703	0.239859	0.00743723
CS-1_24	LA-a	212	3804	28.01	0.6	361	29.9	2.69	0.833379	0.197603	0.0199179
CS-1_25	LA-a	167	2419	48.11	0.79	262.4	23.4	2.48	0.820259	0.241009	0.0558916
CS-1_26	LA-a	136	2279	39.55	0.77	275.6	26.7	2.33	0.840477	0.182427	-0.000743379
CS-1_27	LA-a	192	2981	48.5	0.94	243.2	20.7	2.32	0.835452	0.232523	0.0139772
CS-1_28	LA-a	142	2823	30.13	0.75	304.2	29.4	2.61	0.814558	0.301818	0.0707092
CS-1_29	LA-a	83	1904	41.9	1.4	191.3	23.3	2.83	0.843181	0.1617	-0.00885611
CS-1_30	LA-a	68	1103	35.7	1.6	314.5	42.6	2.54	0.832875	0.257578	0.0213502
CS-1_32	LA-a	309	4178	34.6	1	387	29.3	2.51	0.841002	0.168524	-0.00230913
CS-1_33	LA-a	87	1572	37.67	0.79	268.5	31.3	2.68	0.833249	0.181958	0.0202865
CS-1_34	LA-a	155	2497	33.3	1.1	338.8	32.5	2.52	0.831401	0.278043	0.0255197
CS-1_35	LA-a	307	5372	40	1.3	261.2	20.2	2.61	0.837644	0.153544	0.00760975
CS-1_36	LA-a	93	1611	25.3	1.4	412.3	51.3	2.46	0.836847	0.160247	0.00993492
CS-1_37	LA-a	115	2474	19.88	0.62	422.2	45	2.43	0.831556	0.23633	0.0250825
CS-1_38	LA-a	96	2735	33.61	0.66	192	21.4	2.65	0.830479	0.331025	0.028107
CS-1_39	LA-a	252	4659	28.15	0.75	348.9	27.8	2.78	0.829671	0.179339	0.0303644
CS-1_40	LA-a	135	2150	25.57	0.48	442.7	43	2.28	0.831694	0.245255	0.0246918
CS-4_1	LA-a	243	5835	27.62	0.48	275.4	21.5	2.05	0.842449	0.070434	-0.00664666
CS-4_4	LA-a	135	3556	25.78	0.72	269.1	26.7	2.09	0.839691	0.102895	0.0015889
CS-4_5	LA-a	251	7302	22.07	0.78	284.3	23.6	2.18	0.844062	0.062125	-0.0115322
CS-4_6	LA-a	265	6399	21.77	0.46	345.5	26.5	2.24	0.836164	0.07583	0.0119189
CS-4_7	LA-a	125	2835	22.75	0.53	351.9	35.6	2.04	0.851809	0.062195	-0.0357148
CS-4_8	LA-a	80	2541	17.94	0.75	319.4	40.3	1.97	0.846801	0.058642	-0.0199427
CS-4_9	LA-a	114	4293	12.49	0.38	385	41.1	2.1	0.850714	0.079192	-0.0322211
CS-4_10	LA-a	107	3307	16.06	0.45	365.4	39.7	2.11	0.840802	0.128933	-0.00171091
CS-4_11	LA-a	172	4250	30.23	0.99	245.1	22.7	2.08	0.852368	0.066543	-0.0375101
CS-4_12	LA-a	62	2156	14.93	0.38	349.8	47.5	1.75	0.852973	0.048053	-0.0394584
CS-4_13	LA-a	105	4631	14.75	0.89	280.6	34.2	2.07	0.851963	0.064032	-0.0362096
CS-4_14	LA-a	177	4484	26.79	0.69	269.3	24.1	2.07	0.835369	0.035612	0.0142143
CS-4_15	LA-a	294	7158	23.48	0.69	318.4	24.5	2.33	0.84692	0.063158	-0.0203111
CS-4_16	LA-a	224	5379	36.77	0.86	207.9	17	2	0.852934	0.060586	-0.0393318
CS-4_17	LA-a	98	2485	31.53	0.72	229.3	25.5	2.2	0.840764	0.048168	-0.00159819
CS-4_18	LA-a	123	2835	26.2	1.1	301.8	32.5	2.01	0.854392	0.054301	-0.0440629
CS-4_19	LA-a	180	4037	32.5	1.2	251.1	23.3	2.05	0.837582	0.063878	0.00779115
CS-4_20	LA-a	149	4800	19.68	0.4	287.8	27	2.04	0.846261	0.07196	-0.0182719
CS-4_21	LA-a	122	3268	31.97	0.59	214.3	21.7	2.12	0.848693	0.087578	-0.0258389
CS-4_22	LA-a	132	3744	24.87	0.85	259.3	26.5	2.21	0.842838	0.060239	-0.00782147
CS-4_23	LA-a	81	3602	12.35	0.34	331.1	40.3	1.91	0.848589	0.046619	-0.0255144
CS-4_24	LA-a	117	3123	28.13	0.54	243.9	25.1	2.05	0.851258	0.057186	-0.0339545
CS-4_26	LA-a	186	5827	17.56	0.44	330.6	29	2.03	0.842055	0.080882	-0.00546266
CS-4_27	LA-a	259	6928	25.72	0.84	265.7	21.6	1.98	0.856186	0.043768	-0.0499464
CS-4_28	LA-a	171	3472	25.86	0.58	345.9	31	1.91	0.856846	0.018733	-0.0521269
CS-4_31	LA-a	105	2657	26.5	1	272.4	30.6	2.19	0.847935	0.032472	-0.0234685
CS-4_33	LA-a	89	2028	27.02	0.92	296.2	35.1	1.95	0.850361	0.047877	-0.0311011
CS-4_34	LA-a	96	2394	17.13	0.55	422.7	48.4	2.06	0.853146	0.080004	-0.0400177
CS-4_35	LA-a	96	3208	30.23	0.65	182.1	20.4	1.91	0.851305	0.067131	-0.0341055
CS-4_37	LA-a	31	1878	13.34	0.7	226.9	43.5	2.06	0.849444	0.063246	-0.0281999
CS-4_38	LA-a	128	3825	31.42	0.67	195.7	19.5	1.93	0.849711	0.090109	-0.0290426
CS-4_39	LA-a	190	4874	26.7	0.62	266.8	23.1	2.22	0.857704	0.041641	-0.0549805
CS-4_40	LA-a	187	4404	28.84	0.59	269	23.2	2.02	0.841745	0.055242	-0.00453257
CS-5_2	LA-a	42	2313	11.92	0.81	278.2	48.3	2.81	0.842986	0.030869	-0.0082666
CS-5_3	LA-a	67	3061	17.35	0.35	231.2	30.2	2.71	0.844585	0.032509	-0.0131244
CS-5_4	LA-a	80	2381	23.74	0.48	258.8	31.3	2.49	0.839081	0.066763	0.00339011
CS-5_5	LA-a	60	4739	9.12	0.26	254	35.2	2.04	0.850147	0.047521	-0.0304214
CS-5_6	LA-a	28	2494	7.65	0.29	268.2	52.8	2.33	0.844258	0.044541	-0.012129
CS-5_7	LA-a	68	2891	11.69	0.74	364.9	52.1	2.36	0.84591	0.029971	-0.0171899
CS-5_9	LA-a	25	1902	6.74	0.4	354	75.3	2.41	0.838422	0.032373	0.0053307
CS-5_12	LA-a	97	3597	17.02	0.64	289.1	33.5	2.51	0.829114	0.077872	0.0319124
CS-5_13	LA-a	17	1402	5.25	0.23	417.2	104.2	2.37	0.666497	0.025138	0.349263
CS-5_14	LA-a	20	1671	7.69	0.8	284.1	71	2.45	0.843434	0.032221	-0.00962379
CS-5_15	LA-a	40	3576	5.64	0.2	359.9	60.1	2.03	0.84925	0.064333	-0.0275911
CS-5_16	LA-a	40	2070	9.82	0.33	357.1	59.5	2.38	0.831375	0.053255	0.025593
CS-5_20	LA-a	27	1545	13	1.3	246.1	54.3	1.84	0.851696	0.046754	-0.0353535
CS-5_21	LA-a	33	3187	6.61	0.22	285.9	52	1.97	0.847359	0.052806	-0.0216731
CS-5_24	LA-a	49	2241	11.03	0.5	359.7	55.9	2.34	0.847254	0.029191	-0.0213469
CS-5_25	LA-a	37	1909	7.48	0.17	466.2	79.7	2.61	0.841312	0.065281	-0.00323464
CS-5_26	LA-a	33	2111	11.24	0.63	254.4	47.7	2.75	0.836088	0.045096	0.012138
CS-5_27	LA-a	27	816	31.5	0.76	193.1	38.3	2.69	0.847025	0.009385	-0.0206374
CS-5_28	LA-a	42	4207	5.26	0.17	344.8	56.2	2.67
CS-5_29	LA-a	8	1719	4.69	0.18	182.6	65.4	2.26	0.847754	0.040441	-0.0229032
CS-5_31	LA-a	27	2370	7.15	0.25	290.7	58.1	2.24	0.851558	0.045434	-0.0349133
CS-5_34	LA-a	77	2348	17.9	1.2	333.1	46.1	2.64	0.850134	0.029211	-0.030382
CS-5_35	LA-a	29	2412	7.73	0.26	283.9	54.8	2.08	0.849842	0.025176	-0.0294564
CS-5_36	LA-a	7	1426	4.75	0.16	190	72.5	2.04	0.840846	0.045088	-0.0018416
CS-5_38	LA-a	53	4981	5.07	0.17	380.2	56	2.37	0.839041	0.026829	0.00350954
CS-6_1	LA-a	67	3453	6.97	0.29	499.6	67.6	1.2	0.861166	0	-0.0666695
CS-6_2	LA-a	44	2963	7.35	0.41	366.4	60.8	1.31	0.856238	0.015326	-0.0501171
CS-6_3	LA-a	147	3057	27.38	0.71	319.7	30.6	1.47	0.848589	0.014957	-0.0255141
CS-6_4	LA-a	24	2316	7.71	0.2	246.1	51.6	0.93	0.857057	0.00957	-0.05283
CS-6_5	LA-a	98	2758	33.1	1.3	197.3	22.9	1.3	0.849604	0.013833	-0.0287064
CS-6_8	LA-a	199	3652	30.88	0.91	321.1	27.9	1.32	0.844527	0.01232	-0.0129498
CS-6_9	LA-a	202	3116	52.3	0.95	227.2	19	1.49	0.852983	0.023029	-0.0394908
CS-6_10	LA-a	161	4461	25.82	0.7	255.7	23.7	1.38	0.853859	0.000375	-0.0423262
CS-6_11	LA-a	61	1574	30.21	0.68	235	32	1.14	0.854606	0	-0.0447607
CS-6_12	LA-a	57	1637	25.8	1	247	35.6	1.38	0.849894	0.014187	-0.0296211
CS-6_13	LA-a	155	2301	61.7	1.7	200.6	18.9	1.51	0.851458	0.022827	-0.0345943
CS-6_18	LA-a	175	4297	31.84	0.9	234.4	21.2	1.29	0.849867	0.006228	-0.0295372
CS-6_19	LA-a	111	5345	12.85	0.64	294.7	33.8	1.27	0.858168	0.030877	-0.0565322
CS-6_20	LA-a	85	1960	19.68	0.7	398.6	48.3	1.33	0.850782	0.012423	-0.0324396
CS-6_21	LA-a	66	1722	22.17	0.82	314.8	42.5	1.25
CS-6_23	LA-a	124	3086	39.6	2.5	186.6	21.9	1.2	0.850662	0.012394	-0.032055
CS-6_24	LA-a	96	1542	34.7	0.8	326.4	36.7	1.48	0.854461	0.004709	-0.0442868
CS-6_25	LA-a	62	2083	30.18	0.81	181.5	24.7	1.16	0.857455	0.003173	-0.0541522
CS-6_26	LA-a	43	2657	9.09	0.41	323.9	53.2	1.05	0.856306	0.023122	-0.0503413
CS-6_27	LA-a	72	1995	37.65	0.72	176.4	22.3	1.26	0.844656	0.016772	-0.0133443
CS-6_28	LA-a	58	1621	30.55	0.64	214.9	29.9	1.2	0.844317	0.001515	-0.0123092
CS-6_31	LA-a	57	3187	8.13	0.37	398	58.1	1.13	0.853953	0.012675	-0.0426318
CS-6_32	LA-a	38	2926	8.3	0.19	285.6	48.2	1.08	0.85802	0.014356	-0.056036
CS-6_33	LA-a	96	3757	17.45	0.54	267.6	30.6	1.31	0.855962	0.001991	-0.0492049
CS-6_34	LA-a	85	2027	39.29	0.87	196.1	23.2	1.34	0.847994	0.015507	-0.0236537
CS-6_35	LA-a	325	7311	39.8	1	205.1	15.1	1.4	0.846206	0.029058	-0.0181012
CS-6_36	LA-a	115	1797	33.5	1	347	36.8	1.31	0.845964	0.007911	-0.017357
CS-6_37	LA-a	233	6188	26.98	0.44	255.3	20.2	1.15	0.85542	0.018516	-0.0474239
CS-6_40	LA-a	214	4654	23.68	0.63	352.5	29.6	1.44	0.860095	0.011141	-0.0630243
CS-8_1	LA-a	41	1619	9.66	0.25	471.5	77.1	2.39	0.811381	0.228078	0.0787725
CS-8_2	LA-a	116	2468	21.4	2.9	397.3	67.3	2.61	0.811349	0.24023	0.0788535
CS-8_3	LA-a	91	2384	30.26	0.99	231.2	27.1	2.4	0.819775	0.295017	0.0571664
CS-8_4	LA-a	116	2305	46.4	1	199.3	20.7	2.55	0.844394	0.124591	-0.0125437
CS-8_5	LA-a	129	3325	16.63	0.59	421.3	43.5	2.37	0.82923	0.167241	0.0315906
CS-8_6	LA-a	144	2563	39.5	1.2	260.1	25.4	2.77	0.823678	0.220318	0.0467754
CS-8_7	LA-a	104	2001	32.7	2.8	290	39.6	2.46	0.817153	0.258392	0.0640217
CS-8_8	LA-a	112	1487	43.59	0.74	314.6	32.8	2.5	0.822274	0.181003	0.050539
CS-8_9	LA-a	42	3173	6.26	0.23	383	62.7	2.65	0.797908	0.306524	0.111518
CS-8_10	LA-a	91	2042	17.23	0.83	465.4	57	2.31	0.827909	0.22549	0.0352496
CS-8_11	LA-a	24	1394	16.47	0.97	192.2	41.6	2.28	0.83554	0.167311	0.0137224
CS-8_12	LA-a	158	2430	43.2	1.1	274.9	25.6	2.62	0.827813	0.199464	0.0355141
CS-8_13	LA-a	118	1971	51.47	0.91	213.5	21.8	2.58	0.822585	0.243407	0.0497094
CS-8_14	LA-a	181	2892	42.6	1	268.5	23.6	2.79	0.833869	0.20702	0.0185211
CS-8_15	LA-a	27	901.2	15.59	0.58	349	69.9	2.56	0.830988	0.232952	0.0266797
CS-8_18	LA-a	175	2931	42.1	2.2	259.4	26.1	2.74	0.829054	0.252336	0.0320806
CS-8_21	LA-a	64	979.4	23.62	0.58	496.6	66.5	2.36	0.835302	0.204259	0.0144082
CS-8_22	LA-a	65	1056	24.81	0.73	447.1	59.9	2.47	0.821459	0.191458	0.0527118
CS-8_23	LA-a	112	1792	38.75	0.81	294.2	30.9	2.55	0.830199	0.20069	0.0288913
CS-8_24	LA-a	108	2218	24.81	0.62	356.2	38.3	2.5
CS-8_25	LA-a	71	1285	35.59	0.69	283.4	36	2.63	0.823562	0.179314	0.047088
CS-8_26	LA-a	102	2965	16.6	1.3	375.6	49.8	2.75	0.83315	0.157751	0.0205699
CS-8_27	LA-a	46	2007	12.98	0.39	321.4	50.1	2.69	0.822987	0.187049	0.0486328
CS-8_28	LA-a	38	2264	12.2	0.29	251.7	42.5	2.36	0.834257	0.177982	0.017411
CS-8_29	LA-a	110	2033	25.39	0.86	385.9	42.1	2.59	0.8284	0.196183	0.0338935
CS-8_35	LA-a	96	2996	19.29	0.74	302.7	35.3	2.29	0.84054	0.142985	-0.000931526
CS-8_36	LA-a	146	2278	44.61	0.92	262.7	24.9	2.5	0.821095	0.216932	0.0536788
CS-8_37	LA-a	266	4755	31.3	1.3	325.2	27.5	2.4	0.835125	0.226329	0.014917
CS-8_38	LA-a	55	1651	13.8	0.37	435.4	62.5	2.32	0.822804	0.232889	0.0491226
CS-8_39	LA-a	79	1565	29.4	1.5	312.7	40.7	2.26	0.824893	0.197526	0.0434946
CS-8_40	LA-a	278	3966	49.84	0.88	257.2	19.2	2.35	0.830258	0.221075	0.0287245
CS-9_6	LA-a	22	808.1	15.61	0.5	317.5	69.7	2.09	0.855044	0.004958	-0.0461907
CS-9_7	LA-a	68	1790	30.3	1	229.8	30.4	2.36	0.852514	0.024895	-0.0379803
CS-9_8	LA-a	62	2462	18.3	0.4	251.8	34	2.54	0.851591	0.014747	-0.0350191
CS-9_9	LA-a	40	2143	12.7	0.53	268.6	45.3	1.9	0.850076	0.019259	-0.0301981
CS-9_10	LA-a	22	2071	10.46	0.35	186.8	41	2.33	0.855505	0	-0.0477023
CS-9_11	LA-a	38	2654	10.7	0.24	245	41.4	2.23	0.858372	0.013221	-0.0572154
CS-9_12	LA-a	25	1950	7.22	0.41	323.1	68.5	2.06	0.854101	0.012993	-0.0431137
CS-9_13	LA-a	30	1373	11.79	0.4	336.9	64.1	1.95	0.853751	0.017706	-0.0419779
CS-9_14	LA-a	35	1956	8.62	0.38	376.2	67.5	2.24	0.859928	0.028577	-0.0624562
CS-9_15	LA-a	83	4673	10.18	0.51	317.6	40.5	2.16	0.850655	0.019236	-0.0320354
CS-9_17	LA-a	48	2257	14.43	0.54	269.3	41.6	2.27	0.849293	0.003695	-0.027724
CS-9_19	LA-a	59	2120	12.77	0.34	394.4	54.8	2.39	0.853362	0.013067	-0.0407158
CS-9_21	LA-a	47	2071	12.38	0.64	333.3	53.4	2.16	0.845368	0.028619	-0.0155236
CS-9_23	LA-a	35	1969	14.82	0.31	220	38.5	2.19	0.857137	0.03001	-0.0530939
CS-9_25	LA-a	50	3958	8.43	0.56	273.7	44.2	2.24	0.855531	0.000882	-0.0477871
CS-9_27	LA-a	72	1903	30.8	1.2	225.2	29.4	2.19	0.857953	0.029961	-0.0558113
CS-9_29	LA-a	65	2828	24.35	0.9	173.8	23.6	2.01	0.852663	0.025453	-0.0384604
CS-9_30	LA-a	19	1621	7.82	0.35	273.8	65	2.11	0.850685	0.008458	-0.0321294
CS-9_31	LA-a	33	2603	7.66	0.37	301.7	55.9	2.35	0.85724	0.020838	-0.0534372
CS-9_32	LA-a	25	1346	9.89	0.37	341.3	70.8	2.15	0.856295	0.007096	-0.0503063
CS-9_34	LA-a	23	2179	7.16	0.25	269.4	58	1.95	0.856024	0.040755	-0.049412
CS-9_35	LA-a	13	1211	7.73	0.26	254.1	71.7	1.55	0.8507	0.016108	-0.0321763
CS-9_36	LA-a	33	2210	9.68	0.35	281.6	51.4	2.3	0.857206	0.01471	-0.0533246
CS-9_38	LA-a	98	1793	31.6	1.3	314.9	36.7	2.43
CS-9_39	LA-a	15	1729	6.91	0.19	230.1	60.5	2.22	0.858309	0.000821	-0.0570034
CS-9_40	LA-a	19	1520	8.43	0.26	270.9	63.7	1.93	0.848418	0	-0.0249776
CS-10_1	LA-a	186	4666	31.6	1	231.2	20.7	1.63	0.848006	0.057284	-0.0236908
CS-10_2	LA-a	162	2821	33.1	2.2	315.9	35	1.86	0.852279	0.02891	-0.0372232
CS-10_3	LA-a	100	2571	34.59	0.6	206.5	22.6	1.7	0.851405	0.067788	-0.0344228
CS-10_5	LA-a	107	2377	25.2	1.3	325	38	1.78	0.845986	0.047419	-0.017423
CS-10_7	LA-a	60	4486	6.52	0.22	371.9	51.9	1.62	0.857835	0.009582	-0.0554201
CS-10_8	LA-a	197	4039	37.38	0.75	239	20.2	1.72	0.842733	0.041573	-0.00750244
CS-10_9	LA-a	49	1038	25.6	1.4	335.2	53.1	1.71	0.847107	0.039853	-0.0208914
CS-10_12	LA-a	131	3705	33.96	0.92	191.4	19.2	1.7	0.845251	0.020028	-0.0151646
CS-10_13	LA-a	72	1846	37.12	0.75	193.1	24.4	1.88	0.844587	0.015621	-0.013133
CS-10_14	LA-a	106	2250	28.74	0.54	298.8	32	1.82	0.844875	0.044578	-0.0140111
CS-10_15	LA-a	51	1792	18.04	0.63	287.9	43.2	1.54	0.849837	0.023187	-0.0294416
CS-10_16	LA-a	162	2635	55.1	1.1	204.9	18.6	1.82	0.831621	0.076326	0.0248997
CS-10_18	LA-a	53	1441	27.78	0.64	242.4	35.2	1.91	0.843484	0.037557	-0.009775
CS-10_19	LA-a	47	1109	25.37	0.97	304.4	47.6	1.8	0.846774	0.006647	-0.0198577
CS-10_21	LA-a	84	1868	36.72	0.99	224.6	26.9	1.83	0.848976	0.018695	-0.0267281
CS-10_22	LA-a	54	2680	13.05	0.25	281.9	40.4	1.71	0.853928	0.015662	-0.0425512
CS-10_23	LA-a	25	1388	10.67	0.32	307.5	63.5	1.81	0.849936	0.024862	-0.0297556
CS-10_25	LA-a	64	2026	29.59	0.81	196.2	26.4	1.87	0.843021	0.052353	-0.00837402
CS-10_29	LA-a	27	1717	10.09	0.3	284.5	56.6	1.97	0.851455	0.02032	-0.0345845
CS-10_30	LA-a	116	2682	29.6	1.3	267.1	29.5	1.76	0.851171	0.022247	-0.0336763
CS-10_32	LA-a	37	1485	20.65	0.94	221.3	38.8	1.87	0.845765	0.01854	-0.0167427
CS-10_33	LA-a	37	2074	9.99	0.27	324.9	55.7	1.84	0.848976	0.047705	-0.0267285
CS-10_34	LA-a	29	2035	8.41	0.44	308.7	60.9	2	0.845161	0.03566	-0.0148869
CS-10_35	LA-a	107	2192	35.6	1.2	250.9	27.7	2.16	0.856674	0.021777	-0.0515581
CS-10_36	LA-a	42	2254	12.99	0.37	262.3	42.5	2.1	0.840292	0.036187	-0.000193173
CS-10_37	LA-a	23	1428	13.4	0.34	220.5	47.2	1.93	0.841472	0.031036	-0.00371456
CS-10_38	LA-a	25	2288	9.49	0.26	211.3	43.5	1.76	0.846156	0.012682	-0.0179492
CS-10_39	LA-a	89	1988	35.61	0.73	230.4	26.6	2.09	0.853606	0.057064	-0.0415078
CS-10_40	LA-a	109	3342	13.4	0.81	438.9	52.9	2.01	0.849869	0.023331	-0.0295416
CS-11_1	LA-a	34	1139	18.22	0.29	298.7	52.9	1.56	0.759717	0.062489	0.193669
CS-11_2	LA-a	121	2197	38.14	0.66	264	26.7	1.81
CS-11_3	LA-a	123	1944	61.8	2.1	188.3	19.7	1.7
CS-11_4	LA-a	63	1187	35.46	0.97	273.4	37	1.71	0.686748	0.046017	0.319531
CS-11_5	LA-a	147	2732	35	1.2	280.7	27.6	1.64	0.789887	0.017004	0.12999
CS-11_7	LA-a	116	1544	52.7	1.4	260.7	27.3	1.8	0.73791	0.018742	0.234899
CS-11_8	LA-a	45	1179	24.66	0.7	282.5	44.4	1.65	0.801904	0.020299	0.10204
CS-11_9	LA-a	94	2138	36.3	1	222.1	25.4	1.58	0.84141	0.000336	-0.00352694
CS-11_10	LA-a	91	1643	45.4	1.3	223.7	26	1.61	0.769525	0.054128	0.17389
CS-11_11	LA-a	59	1153	38.3	1.6	244.6	34.9	1.69	0.739637	0.05083	0.231761
CS-11_12	LA-a	24	811.3	20.51	0.41	263.7	55.1	1.68	0.822268	0	0.0505556
CS-11_13	LA-a	98	1578	54.7	1.2	208.5	23.2	1.64	0.795977	0.020136	0.116032
CS-11_14	LA-a	80	1532	36	1	265.1	32.4	1.73	0.780592	0.050743	0.150534
CS-11_15	LA-a	63	3605	16.74	0.44	191.9	25.9	1.77	0.678404	0.067379	0.332008
CS-11_16	LA-a	135	2736	35.84	0.9	251.9	24.8	1.7	0.684487	0.054961	0.322945
CS-11_19	LA-a	48	1584	24.09	0.55	230.6	35	1.64	0.808883	0.033825	0.0850169
CS-11_21	LA-a	71	1286	41.43	0.83	244	31	1.66
CS-11_22	LA-a	62	2415	17.16	0.59	273.3	37.7	1.64
CS-11_24	LA-a	65	980.9	64.5	1.4	188.9	25	1.69	0.785274	0.044173	0.140299
CS-11_25	LA-a	250	3303	57.4	1.1	241.5	18.8	1.94	0.749447	0.052012	0.213533
CS-11_26	LA-a	38	1580	18.13	0.43	242.9	41	1.6	0.802578	0.047593	0.100421
CS-11_27	LA-a	53	1280	33.64	0.99	225.7	33	1.79	0.773797	0.023538	0.165011
CS-11_28	LA-a	41	1147	29.15	0.61	224.9	36.6	1.72	0.808414	0.009714	0.0861811
CS-11_29	LA-a	125	2512	44.71	0.7	204.4	20.4	1.58	0.764262	0.026055	0.184607
CS-11_30	LA-a	63	1732	29.05	0.65	229.5	30.8	1.75	0.78241	0.046658	0.146587
CS-11_31	LA-a	42	1443	22.3	0.78	239.1	39.1	2.05
CS-11_32	LA-a	129	1832	45.4	0.99	283.1	28.2	1.79	0.77744	0.03125	0.157305
CS-11_33	LA-a	118	2004	36.71	0.83	292.6	30.2	1.84	0.737543	0.045117	0.235563
CS-12_1	LA-a	102	2044	38.71	0.78	236.2	25.7	1.42	0.78537	0.021833	0.140085
CS-12_2	LA-a	155	2907	26.19	0.66	369.1	34.6	1.48
CS-12_3	LA-a	52	1240	22.85	0.47	333.7	48.7	1.32	0.828095	0.021932	0.0347362
CS-12_4	LA-a	106	2157	32.33	0.7	277.6	29.9	1.41	0.773102	0.027789	0.166467
CS-12_5	LA-a	216	3136	44.9	0.91	280.1	23	1.5	0.77627	0.040224	0.159794
CS-12_7	LA-a	265	4650	29.03	0.67	356.3	27.6	1.45	0.748843	0.023198	0.214676
CS-12_8	LA-a	94	1794	29.81	0.71	319.9	36.3	1.43	0.775187	0.042152	0.162084
CS-12_9	LA-a	206	3397	35.91	0.69	307.7	25.6	1.51	0.759973	0.029405	0.193164
CS-12_10	LA-a	181	2841	31.09	0.62	371.5	32.4	1.44	0.755753	0.015861	0.201435
CS-12_11	LA-a	88	1130	34.2	1.3	411.5	49.5	1.54	0.754341	0.042143	0.204172
CS-12_12	LA-a	39	1446	22	0.54	224.8	37.6	1.33	0.801829	0.021917	0.10222
CS-12_13	LA-a	88	2327	22.9	0.43	301	34.8	1.22	0.778558	0.049598	0.154916
CS-12_14	LA-a	109	2366	36.56	0.94	231	24.8	1.58	0.78495	0.02663	0.141013
CS-12_15	LA-a	103	1876	45	1	223.7	24.4	1.47	0.790112	0.034364	0.129483
CS-12_17	LA-a	149	3096	36.3	1.3	242.8	23.9	1.28	0.771202	0.03426	0.170425
CS-12_19	LA-a	189	2759	54.3	1.1	231.2	19.9	1.47	0.808403	0.01745	0.0862074
CS-12_20	LA-a	54	1268	27.59	0.63	281.8	40.6	1.41	0.779251	0.023556	0.153426
CS-12_21	LA-a	99	2213	31.1	1	263	29.8	1.3	0.765713	0.017354	0.181676
CS-12_22	LA-a	232	3097	37.41	0.84	363.2	29.3	1.56	0.743805	0.031204	0.224102
CS-12_23	LA-a	153	2449	50	1.8	229	22.3	1.47	0.744503	0.038663	0.222807
CS-12_24	LA-a	47	788.5	33.99	0.65	319.2	48.7	1.14	0.762538	0.015906	0.188064
CS-12_26	LA-a	154	2775	50.3	1.2	202.7	18.9	1.49	0.746147	0.023387	0.219744
CS-12_27	LA-a	105	1529	45.2	1.9	277.5	31.6	1.61	0.782491	0.041639	0.14641
CS-12_28	LA-a	33	3098	8.65	0.27	225.8	41	1.29	0.859897	0.011451	-0.062354
CS-12_30	LA-a	86	1725	39.35	0.94	232.2	27.3	1.37	0.769296	0.008238	0.174361
CS-12_31	LA-a	62	1507	29.59	0.8	254.4	34.6	1.34	0.770535	0.017412	0.171807
CS-12_32	LA-a	117	3407	30	1.3	210.1	23.1	1.49	0.741386	0.07104	0.228562
CS-12_35	LA-a	189	2981	47.9	1.8	242.4	22.2	1.49	0.757775	0.022083	0.197489
CS-12_36	LA-a	60	1933	28.01	0.9	203.5	28.3	1.36	0.866328	0	-0.0846526
CS-12_37	LA-a	178	2981	37.27	0.73	292.2	25.6	1.51	0.770784	0.01738	0.171292
CS-12_38	LA-a	83	1503	56.2	1.4	180.8	21.7	1.6	0.783402	0.024861	0.144417
CS-12_40	LA-a	172	2139	56.3	1.2	261.2	23.3	1.43	0.795071	0.038545	0.118134
PV-1_1	LA-a	32	994.3	21.2	1.1	277.2	52.3	1.78	0.751921	0.227236	0.208823
PV-1_2	LA-a	9	904.3	6.31	0.21	287.8	97.1	1.43	0.722998	0.229476	0.261163
PV-1_5	LA-a	26	1673	7.53	0.24	374.1	75.9	1.41	0.754492	0.208259	0.203879
PV-1_6	LA-a	29	1930	6.26	0.21	433	83.6	1.36	0.748929	0.146581	0.214514
PV-1_8	LA-a	9	1016	8.14	0.24	199.9	67.4	1.44	0.72565	0.217297	0.256596
PV-1_9	LA-a	10	1188	5.83	0.2	263.9	84.6	1.79	0.770754	0.122621	0.171353
PV-1_10	LA-a	16	1101	5.84	0.2	448.4	114.6	1.54	0.747108	0.194075	0.217944
PV-1_11	LA-a	40	2246	8.85	0.21	365	60.2	1.51	0.748725	0.195705	0.2149
PV-1_12	LA-a	31	1739	6.7	0.2	478.3	89.3	1.6	0.723081	0.192849	0.261021
PV-1_13	LA-a	64	2929	15.32	0.55	260.8	35.6	1.35	0.778132	0.220501	0.155826
PV-1_14	LA-a	19	1764	7.2	0.27	273.3	64.5	1.47	0.763075	0.202497	0.18699
PV-1_15	LA-a	21	2089	6.17	0.18	297.1	66.5	2.11	0.75994	0.238341	0.19323
PV-1_16	LA-a	32	1797	7.19	0.22	446.3	82.1	1.77	0.752014	0.159263	0.208646
PV-1_17	LA-a	25	1412	7.33	0.21	435.7	89.8	1.64	0.76078	0.17725	0.191566
PV-1_18	LA-a	16	1286	9.54	0.22	238.9	60.8	1.4	0.753672	0.192312	0.205463
PV-1_20	LA-a	28	2250	6.74	0.21	335.6	65.7	1.42	0.769945	0.154259	0.173026
PV-1_21	LA-a	24	1718	6.15	0.21	410.5	86.6	1.41	0.749662	0.18659	0.213127
PV-1_22	LA-a	36	3707	5.94	0.2	298.1	52.1	1.59	0.750796	0.209048	0.210972
PV-1_23	LA-a	22	1515	7.64	0.26	345.3	75.9	1.76	0.755589	0.190427	0.201754
PV-1_25	LA-a	30	2451	5.25	0.17	421	79.9	1.55	0.76284	0.169344	0.187461
PV-1_26	LA-a	31	2181	5.6	0.21	457	85.9	1.41	0.760302	0.137346	0.192514
PV-1_27	LA-a	14	1431	6.01	0.19	296.8	80.8	1.58	0.752913	0.23388	0.206923
PV-1_28	LA-a	19	1020	9.09	0.39	371.5	88	1.59	0.756398	0.187483	0.20018
PV-1_29	LA-a	34	2096	7.12	0.2	411.7	73.5	1.56	0.768242	0.121657	0.176525
PV-1_30	LA-a	26	1573	6.5	0.42	457.9	96.4	1.78	0.753466	0.232461	0.20586
PV-1_31	LA-a	8	1054	5.53	0.19	251.2	89.8	1.85	0.746636	0.226352	0.218828
PV-1_32	LA-a	31	2417	6.64	0.16	350.7	65.2	1.45	0.75714	0.153859	0.198732
PV-1_35	LA-a	33	3076	6.58	0.28	297.3	54.6	1.6	0.767543	0.184925	0.177954
PV-1_37	LA-a	14	1786	6.66	0.25	216	59	1.46	0.749393	0.238578	0.213636
PV-1_38	LA-a	32	1637	7.05	0.21	497.7	91.5	1.76	0.769086	0.246567	0.174793
PV-1_39	LA-a	46	2671	8.8	0.25	355.2	55.3	1.58	0.75719	0.227298	0.198635
PV-1_40	LA-a	23	1892	6.31	0.21	349.8	75.2	1.53	0.760909	0.163481	0.19131
GV14JAW182_1	LA-b	25	1102	16.69	0.38	257.3	51.8	1.17	0.807194	0.066616	0.0891923
GV14JAW182_2	LA-b	20	1177	14.39	0.25	224.1	50.3	1.32	0.82865	0.061693	0.0332009
GV14JAW182_3	LA-b	30	930	28.92	0.51	211.9	38.9	1.28	0.788835	0.037811	0.132361
GV14JAW182_4	LA-b	28	742	39.3	1.2	182.8	35	1.33	0.796605	0.087235	0.114567
GV14JAW182_5	LA-b	27	1100	13.4	0.24	344.3	66.6	1.09	0.799205	0.097922	0.108461
GV14JAW182_6	LA-b	40	981.7	25.83	0.65	297.6	47.6	1.23	0.797645	0.182708	0.112135
GV14JAW182_7	LA-b	37	1074	29.04	0.68	225.1	37.4	1.36	0.777356	0.104154	0.157485
GV14JAW182_8	LA-b	33	989	20.21	0.39	311.2	54.5	1.3	0.800903	0.058721	0.104432
GV14JAW182_9	LA-b	22	1171	15.05	0.29	236.6	50.7	1.16	0.803877	0.041797	0.0972874
GV14JAW182_10	LA-b	11	1066	13.41	0.26	146.9	44.4	1.32	0.823112	0.045719	0.0482981
GV14JAW182_11	LA-b	59	773.7	56.6	2.5	255	35.1	1.25	0.79263	0.058625	0.123753
GV14JAW182_12	LA-b	19	1240	16.11	0.33	181.1	41.7	1.36	0.795754	0.077759	0.11655
GV14JAW182_13	LA-b	56	1401	23.19	0.49	324.5	43.9	1.35	0.813264	0.076358	0.0740103
GV14JAW182_14	LA-b	27	1032	21.34	0.42	232.5	45	1.18	0.811259	0.090375	0.0790804
GV14JAW182_15	LA-b	12	847.3	14.64	0.41	184.1	53.4	1.41	0.798449	0.058534	0.110246
GV14JAW182_16	LA-b	34	865.5	27.99	0.54	265.5	45.8	1.2	0.810097	0.056152	0.0819926
GV14JAW182_17	LA-b	20	1016	17.5	1.2	213.6	50	1.14	0.826314	0.047444	0.0396272
GV14JAW182_18	LA-b	55	978.1	42.79	0.72	248.9	33.8	1.24	0.768736	0.093893	0.175513
GV14JAW182_19	LA-b	21	992.2	16.21	0.46	247.3	54.4	1.57	0.80418	0.03707	0.0965539
GV14JAW182_21	LA-b	14	882.1	14.05	0.34	214.5	57.6	1.47	0.797219	0.048224	0.113134
GV14JAW182_22	LA-b	40	1242	32.35	0.44	189.4	30.1	1.16	0.818134	0.034581	0.0614696
GV14JAW182_23	LA-b	20	834.3	20.23	0.35	224.8	50.4	1.21	0.818811	0.049689	0.0596975
GV14JAW182_24	LA-b	18	888.1	15.32	0.32	250.5	59.3	1.16	0.793245	0.077836	0.122344
GV14JAW182_25	LA-b	30	1118	18.34	0.76	276.5	51.8	1.18	0.795886	0.052928	0.116244
GV14JAW182_26	LA-b	41	1441	15.78	0.31	339.1	53.4	1.16	0.815315	0.069726	0.0687695
GV14JAW182_27	LA-b	12	873.8	11.05	0.23	235.6	68.2	1.17	0.816425	0.059511	0.0659092
GV14JAW182_28	LA-b	23	924.5	13.46	0.45	347.4	73.4	1.33	0.834178	0.058629	0.0176375
GV14JAW182_29	LA-b	24	1214	10.36	0.23	358.3	73.6	1.15	0.819199	0.061735	0.0586813
GV14JAW182_30	LA-b	27	1034	17.02	0.36	289.6	56.1	1.23	0.816641	0.030586	0.0653502
GV14JAW182_31	LA-b	58	1232	38.84	0.75	229.9	30.5	1.36	0.740636	0.140152	0.229938
GV14JAW182_32	LA-b	21	1428	12.8	0.28	218.1	47.8	1.25	0.810192	0.087369	0.0817543
GV14JAW182_33	LA-b	15	870.6	9.95	0.26	326	84.6	1.2	0.80676	0.057795	0.0902593
GV14JAW182_34	LA-b	26	1307	13.45	0.35	279.4	55.3	1.22	0.820677	0.057069	0.0547844
GV14JAW182_35	LA-b	28	693	36.75	0.6	208.9	39.6	1.39	0.759406	0.145689	0.194283
GV14JAW182_36	LA-b	32	1070	15.75	0.37	356.6	63.6	1.28	0.807602	0.061673	0.0881882
GV14JAW182_37	LA-b	23	1049	16.38	0.34	253.4	53.1	1.17	0.770241	0.084111	0.172414
GV14JAW182_38	LA-b	40	790.7	37.3	0.77	256.7	40.9	1.46	0.749523	0.127929	0.21339
GV14JAW182_39	LA-b	21	965.6	16.26	0.36	253.2	55.5	1.3	0.799661	0.048864	0.107384
GV14JAW182_40	LA-b	25	1107	22.33	0.51	192.4	38.7	1.31	0.798356	0.052975	0.110465
GV14JAW183_1	LA-b	11	2180	3.09	0.11	307.8	93.5	1.29	0.84869	0.004203	-0.0258313
GV14JAW183_2	LA-b	31	1029	15.87	0.36	356.5	64.5	1.57	0.822585	0.006546	0.0497093
GV14JAW183_3	LA-b	20	1147	10.43	0.27	315	70.9	1.55	0.845009	0.001088	-0.0144233
GV14JAW183_5	LA-b	19	883.8	19.25	0.51	212.1	49	1.46	0.842572	0.012203	-0.00701936
GV14JAW183_6	LA-b	19	770.5	11.83	0.49	390.4	91	1.65
GV14JAW183_7	LA-b	23	1165	13.88	0.35	269	56.5	1.7	0.821728	0.003423	0.0519963
GV14JAW183_10	LA-b	46	1127	29.44	0.65	262.3	39.1	1.94
GV14JAW183_11	LA-b	19	1214	16.29	0.9	182.9	43.2	1.19
AB14JAW004_2	LA-b	35	948	19.84	0.91	349.7	61.2	1.46	0.683678	0.038722	0.324161
AB14JAW004_3	LA-b	27	785.1	17.39	0.47	371	72.1	1.32	0.801891	0.034652	0.102069
AB14JAW004_4	LA-b	30	783.6	29.74	0.89	243.9	45.1	1.43	0.691312	0.046769	0.312565
AB14JAW004_6	LA-b	44	892.8	23.67	0.59	390	59.6	1.37	0.728909	0.030844	0.250924
AB14JAW004_7	LA-b	38	1096	22.02	0.74	297.1	49.2	1.47	0.678179	0.012218	0.33234
AB14JAW004_8	LA-b	43	1031	23.1	0.44	339.5	52.2	1.34	0.719973	0.012185	0.266317
AB14JAW004_10	LA-b	25	1268	10.7	0.29	346.3	69.9	1.46	0.621565	0.057726	0.40925
AB14JAW004_11	LA-b	40	1095	24.8	1.3	278.3	46.4	1.54	0.704128	0.017089	0.29244
AB14JAW004_13	LA-b	42	958.7	23.37	0.63	352.2	55.2	1.43	0.730691	0.034621	0.247795
AB14JAW004_14	LA-b	13	868	9.87	0.34	286.5	80.1	1.15	0.699194	0.045831	0.300289
AB14JAW004_15	LA-b	45	983.8	35.43	0.58	244.6	36.7	1.53	0.626395	0.04905	0.403154
AB14JAW004_16	LA-b	21	895.9	20.95	0.61	212.5	46.8	1.26	0.715853	0.010513	0.273249
AB14JAW004_17	LA-b	19	754.8	23.66	0.49	202.2	46.6	1.43	0.682918	0.113818	0.325299
AB14JAW004_18	LA-b	47	889.5	29.3	0.6	339.1	50	1.39	0.695076	0.032982	0.306742
AB14JAW004_19	LA-b	39	882.3	25.88	0.55	321.6	52	1.37	0.688984	0.050626	0.316132
AB14JAW004_20	LA-b	39	1143	28.67	0.82	225.8	36.7	1.29	0.70098	0.019394	0.297463
AB14JAW004_21	LA-b	48	1294	28.8	1.4	244	37.2	1.37	0.683782	0.072921	0.324004
AB14JAW004_22	LA-b	19	1274	11.12	0.25	253.9	58.5	1.34	0.708374	0.020162	0.285581
AB14JAW004_24	LA-b	55	1001	33.41	0.72	310	42.3	1.42	0.701034	0.033036	0.297377
AB14JAW004_25	LA-b	13	1642	8.37	0.23	180.1	50.2	1.5	0.690372	0.061869	0.314009
AB14JAW004_26	LA-b	20	1331	15	1.5	190.6	46.7	1.39	0.635528	0.029953	0.391407
AB14JAW004_27	LA-b	56	1253	34.7	0.74	244	33	1.41	0.687963	0.005145	0.317686
AB14JAW004_29	LA-b	29	1173	22.93	0.85	204.9	38.8	1.28	0.711222	0.031416	0.280922
AB14JAW004_30	LA-b	72	1718	30.46	0.67	260.3	31.2	1.44	0.690927	0.043436	0.313157
AB14JAW004_31	LA-b	31	749	30.1	0.64	260.2	47.1	1.44	0.675653	0.015385	0.336051
AB14JAW004_32	LA-b	50	962.8	31.08	0.62	314.8	45	1.47	0.619564	0.071285	0.411753
AB14JAW004_33	LA-b	48	1353	25.21	0.52	266.2	38.8	1.38	0.682053	0.034662	0.326592
AB14JAW004_34	LA-b	27	721.4	16.68	0.48	419.3	81.6	1.37	0.681785	0.045009	0.326993
AB14JAW004_36	LA-b	51	1584	27.91	0.6	219	31	1.36	0.699145	0.032145	0.300367
AB14JAW004_37	LA-b	51	1217	23.69	0.66	332.8	47.5	1.38	0.712664	0.03051	0.278546
AB14JAW004_38	LA-b	43	1345	20.08	0.52	300.3	46.5	1.3	0.730779	0.040985	0.24764
AB14JAW004_39	LA-b	44	1584	26.89	0.52	196.4	29.9	1.39	0.674152	0.028943	0.338242
AB14JAW004_40	LA-b	60	1150	38.2	0.84	258.5	33.8	1.36	0.694806	0.018624	0.307163
GV14SKR033_3	LA-b	55	775.8	46.22	0.78	289.6	39.1	1.27	0.707774	0.165548	0.286555
GV14SKR033_6	LA-b	4	981.8	5.13	0.15	151.6	75.8	1.08	0.844446	0.068753	-0.0127027
GV14SKR033_8	LA-b	18	1332	7.94	0.23	320.5	75.7	1.39	0.810644	0.325852	0.0806233
GV14SKR033_9	LA-b	16	1184	10	0.21	255.8	64	1.47	0.811601	0.27406	0.0782177
GV14SKR033_10	LA-b	19	1188	9	0.26	334.3	76.8	1.05	0.841287	0.124768	-0.00315948
GV14SKR033_11	LA-b	8	1074	5.88	0.18	240.1	85	1.33	0.838961	0.10391	0.0037443
GV14SKR033_12	LA-b	57	815	74.5	1.5	178.8	23.7	1.67	0.641276	0.261341	0.383862
GV14SKR033_13	LA-b	11	1833	5.15	0.2	221.2	66.8	1.82	0.799278	0.469142	0.10829
GV14SKR033_14	LA-b	17	934.5	11.19	0.27	306.5	74.4	1.11	0.810562	0.321111	0.0808284
GV14SKR033_21	LA-b	11	1220	5.69	0.15	298.9	90.2	1.25	0.739477	0.319496	0.232052
GV14SKR033_22	LA-b	3	1982	0.709	0.069	399	231.2	0.97	0.846139	0.043381	-0.0178968
GV14SKR033_23	LA-b	1	1127	1.531	0.084	111	111.1	1.03	0.843532	0.051273	-0.00992097
GV14SKR033_25	LA-b	6	780.6	2.761	0.094	516.5	211	1.45	0.844592	0.05369	-0.013147
GV14SKR033_27	LA-b	9	1049	5.66	0.18	286.2	95.5	1.51	0.805028	0.35539	0.0944949
GV14SKR033_28	LA-b	7	1129	5.7	0.21	206.7	78.2	1.65	0.835219	0.107775	0.0146461
GV14SKR033_30	LA-b	17	708.2	17.56	0.42	258.7	62.8	1.64	0.83219	0.128948	0.0232935
GV14SKR033_31	LA-b	15	1305	8.82	0.2	246.8	63.8	1.59	0.806273	0.08239	0.0914541
GV14SKR033_32	LA-b	61	948.7	59.3	1.1	206	26.4	1.62	0.737835	0.13974	0.235035
GV14SKR033_34	LA-b	18	475.9	33.4	1.6	215	50.9	1.06	0.799063	0.396717	0.108798
GV14SKR033_35	LA-b	3	1609	1.211	0.077	290.9	168.2	1.56	0.839911	0.043207	0.000935945
GV14SKR033_37	LA-b	31	746.2	25.22	0.76	310.5	56	1.67	0.712434	0.212558	0.278926
GV14SKR033_38	LA-b	6	791	6.64	0.21	216.9	88.6	1.4	0.735812	0.349264	0.238683
GV14SKR033_39	LA-b	7	1145	1.876	0.09	599.2	226.9	1.01	0.840789	0.030501	-0.00167194
GV14SKR033_40	LA-b	65	655.2	93.3	1.7	202.1	25.1	1.58	0.673429	0.171832	0.339294
GV14SKR033_41	LA-b	11	1166	6.54	0.17	272.7	82.3	1.42	0.821735	0.145441	0.0519771
GV14SKR033_42	LA-b	25	550.7	40.3	0.72	213.9	42.8	1.53	0.676355	0.266817	0.335022
GV14SKR033_45	LA-b	5	1070	4.41	0.24	201.4	90.2	1.05	0.828508	0.067294	0.0335934
GV14SKR033_47	LA-b	5	1169	3.2	0.13	253.1	113.3	1.14	0.799653	0.265501	0.107402
GV15JAW261_2	LA-b	101	1718	57.3	1.2	195.1	19.5	1.51	0.829101	0.133611	0.0319486
GV15JAW261_4	LA-b	84	1879	34.8	0.84	243.4	26.7	1.39	0.844571	0.163139	-0.0130843
GV15JAW261_5	LA-b	56	1310	45.7	1.9	178.1	24.1	1.49	0.836573	0.158101	0.0107315
GV15JAW261_9	LA-b	54	903.1	55.71	0.82	204	27.8	1.49	0.824684	0.161511	0.0440611
GV15JAW261_11	LA-b	36	1087	24.92	0.48	251.6	42	1.51	0.846231	0.144586	-0.0181792
GV15JAW261_14	LA-b	117	1895	59.2	1.3	198.3	18.5	1.5	0.82776	0.137379	0.0356604
GV15JAW261_18	LA-b	94	2016	43.63	0.71	203.1	21	1.44	0.842661	0.151819	-0.00728515
GV15JAW261_19	LA-b	75	1425	37.58	0.67	264.9	30.7	1.57	0.811	0.188477	0.0797313
GV15JAW261_20	LA-b	50	1020	58.6	1.3	159.5	22.6	1.45	0.84782	0.142219	-0.0231094
GV15JAW261_25	LA-b	70	1447	45.7	2.2	201.2	24.5	1.51	0.838091	0.149399	0.00630198
GV15JAW261_26	LA-b	53	1189	30.61	0.64	275.2	37.9	1.45	0.839457	0.128117	0.00228215
GV15JAW261_27	LA-b	88	1465	47.5	1.4	239.7	25.8	1.48	0.821666	0.129455	0.0521616
GV15JAW261_29	LA-b	56	2024	39.9	1.2	132.5	17.8	1.51	0.836026	0.135919	0.0123163
GV15JAW261_31	LA-b	57	1156	38.81	0.63	240.8	31.9	1.55	0.829536	0.173486	0.0307402
GV15JAW261_32	LA-b	36	1193	30.39	0.63	188.9	31.5	1.36	0.835252	0.17897	0.0145511
GV15JAW261_33	LA-b	57	1684	29.37	0.96	218.8	29.2	1.31	0.823819	0.127739	0.0463971
GV15JAW261_34	LA-b	75	840.2	92.8	1.8	183.1	21.2	1.56	0.825445	0.165505	0.0419958
GV15JAW261_35	LA-b	51	1284	45.3	1.3	167.1	23.5	1.52	0.844272	0.126995	-0.0121718
GV15JAW261_38	LA-b	21	903.5	32.68	0.86	135.9	29.7	1.62	0.840818	0.155624	-0.0017609
GV15JAW261_40	LA-b	65	1389	39.9	1.7	222.6	28	1.48	0.836109	0.140039	0.0120765
BM16JAW070_1	LA-b	46	2959	10.81	0.21	271.9	40.2	1.77	0.78545	0.067691	0.139909
BM16JAW070_2	LA-b	98	1575	52.5	1.2	224.9	22.9	2.38	0.727356	0.076541	0.253636
BM16JAW070_3	LA-b	46	1759	21.34	0.99	232.4	34.7	2.4
BM16JAW070_4	LA-b	107	2174	31.82	0.83	291.9	28.5	2.17	0.730083	0.040357	0.248865
BM16JAW070_5	LA-b	61	1046	39.33	0.83	280.1	36	2.23
BM16JAW070_6	LA-b	39	1447	25.31	0.6	202.4	32.5	2.11	0.789474	0.061429	0.130923
BM16JAW070_7	LA-b	48	1209	31.05	0.9	242.3	35.1	1.87	0.773894	0.045365	0.164807
BM16JAW070_8	LA-b	65	1112	42.31	0.86	261.4	32.5	2.52
BM16JAW070_9	LA-b	76	1423	43.1	0.74	234.9	27	2.24	0.768247	0.033173	0.176515
BM16JAW070_10	LA-b	48	1243	31.9	0.5	229.6	33.2	2.79
BM16JAW070_11	LA-b	60	2273	15.11	0.31	328.8	42.6	1.75	0.793099	0.095142	0.12268
BM16JAW070_12	LA-b	49	1728	19.48	0.38	275.1	39.4	1.88	0.78731	0.073498	0.135776
BM16JAW070_13	LA-b	68	2358	16.68	0.4	325.5	39.7	1.68	0.762104	0.058933	0.188932
BM16JAW070_14	LA-b	38	1328	21.33	0.4	254	41.3	1.92	0.771601	0.062987	0.169597
BM16JAW070_15	LA-b	47	2205	13.9	0.43	289.5	42.5	1.85	0.768776	0.058139	0.175429
BM16JAW070_16	LA-b	64	2379	15.58	0.36	325.1	40.8	1.7	0.773211	0.058172	0.166239
BM16JAW070_17	LA-b	54	1891	13.07	0.29	408.6	55.8	1.87
BM16JAW070_18	LA-b	58	806.5	55.2	1.3	246.8	32.5	2.14
BM16JAW070_20	LA-b	38	1322	19.09	0.36	284.4	46.2	2.23
BM16JAW070_21	LA-b	31	1407	16.13	0.39	258.5	46.5	2.62
BM16JAW070_22	LA-b	31	1196	16.01	0.49	305.3	55	1.97	0.785274	0.04851	0.140297
BM16JAW070_23	LA-b	23	1311	19.7	0.4	169.7	35.4	2.29
BM16JAW070_25	LA-b	18	1216	11.79	0.37	238	56.2	2.51	0.785772	0.047722	0.139195
BM16JAW070_27	LA-b	29	1068	15.17	0.37	336.7	62.7	2.09	0.76646	0.146257	0.18016
BM16JAW070_28	LA-b	29	897.3	23.73	0.46	257.8	47.9	2.4	0.752782	0.064476	0.207175
BM16JAW070_30	LA-b	53	1035	47.74	0.92	203.9	28.1	2.79
BM16JAW070_32	LA-b	55	1795	18.9	0.61	305.7	41.5	1.99	0.743353	0.049288	0.224939
BM16JAW070_34	LA-b	19	1253	11.58	0.39	248	57.1	1.59	0.784646	0.051029	0.141683
BM16JAW070_36	LA-b	45	1044	28.2	0.6	288.6	43.1	2.12
BM16JAW070_37	LA-b	14	738	14.48	0.44	248.1	66.4	2.45
BM16JAW070_38	LA-b	38	2106	13.4	0.28	254.9	41.4	2.83	0.791608	0.115925	0.126088
BM16JAW070_39	LA-b	47	2274	13.17	0.43	296.1	43.5	2.84
BM16JAW070_42	LA-b	42	1996	20.45	0.43	195.7	30.3	1.8
BM16JAW070_43	LA-b	60	2226	20.48	0.42	249.2	32.3	1.83	0.751072	0.032473	0.210445

## Sheet: Confined Lengths
Grain No.	True Length (µm)	Angle to c-axis	Dpar	rmr0	Cl (wt%)		*table definitions: Grain No. = apatite grain analysed; True Length (µm) = absolute length of confined track within analysed grain, expressed as µm; Angle to c-axis = angle of confined track to grainc-axis, expressed as degrees; Dpar (µm) = average diametre of grain etch pits measured parallel to the grain c-axis, expressed as µm; rmr0 = rmr0 proxy calculated form individual grain geochemistry; C…
CS-1_1	11.36	22.36	2.45	0.831833	0.175447
CS-1_2	12.21	65.94	2.48	0.837128	0.216531
CS-1_2	12.05	86.48	2.48	0.837128	0.216531
CS-1_2	12.16	59.58	2.48	0.837128	0.216531
CS-1_2	12.55	68.39	2.48	0.837128	0.216531
CS-1_3	12.37	60.38	2.52	0.826074	0.169149
CS-1_3	9.4	73.46	2.52	0.826074	0.169149
CS-1_3	12.59	68.15	2.52	0.826074	0.169149
CS-1_3	12.9	55.63	2.52	0.826074	0.169149
CS-1_3	11.52	64.64	2.52	0.826074	0.169149
CS-1_4	11.83	71.46	2.4	0.833224	0.246948
CS-1_4	10.43	52.33	2.4	0.833224	0.246948
CS-1_4	12.82	46.89	2.4	0.833224	0.246948
CS-1_4	11.18	62.06	2.4	0.833224	0.246948
CS-1_5	14.7	44.35	2.7	0.817524	0.275574
CS-1_5	13.27	77.43	2.7	0.817524	0.275574
CS-1_6	12.65	44.15	2.61	0.82476	0.247292
CS-1_8	12.55	66.31	2.35	0.828548	0.218183
CS-1_8	13.94	54.31	2.35	0.828548	0.218183
CS-1_8	11.61	57.54	2.35	0.828548	0.218183
CS-1_8	10.43	82.81	2.35	0.828548	0.218183
CS-1_8	13.45	35.25	2.35	0.828548	0.218183
CS-1_8	10.97	65.69	2.35	0.828548	0.218183
CS-1_8	13.23	69.65	2.35	0.828548	0.218183
CS-1_10	13.01	73.48	2.46	0.831511	0.285064
CS-1_10	12.04	81.89	2.46	0.831511	0.285064
CS-1_10	14.94	58	2.46	0.831511	0.285064
CS-1_11	9.89	79.64	2.58	0.835901	0.244842
CS-1_11	11.86	63.82	2.58	0.835901	0.244842
CS-1_11	11.68	36.81	2.58	0.835901	0.244842
CS-1_11	10.65	71.97	2.58	0.835901	0.244842
CS-1_12	12.56	15.51	2.46	0.832155	0.190045
CS-1_12	11.62	49.62	2.46	0.832155	0.190045
CS-1_13	13.42	59.72	2.55	0.825472	0.317766
CS-1_13	12.81	85.71	2.55	0.825472	0.317766
CS-1_13	14.06	35.36	2.41	0.825472	0.317766
CS-1_14	13.85	72.32	2.41	0.836196	0.217499
CS-1_14	11.19	64.25	2.41	0.836196	0.217499
CS-1_14	12.21	38.63	2.41	0.836196	0.217499
CS-1_14	9.41	87.7	2.41	0.836196	0.217499
CS-1_14	13.05	78.1	2.41	0.836196	0.217499
CS-1_14	13.8	85.1	2.41	0.836196	0.217499
CS-1_15	10.69	80.31	2.79	0.820461	0.288157
CS-1_16	13.03	66.49	1.98	0.839923	0.151712
CS-1_16	11.74	50.67	1.98	0.839923	0.151712
CS-1_16	12.84	64.59	1.98	0.839923	0.151712
CS-1_17	11.22	67.21	2.21	0.82257	0.206632
CS-1_17	13.09	25.9	2.21	0.82257	0.206632
CS-1_17	11.53	61.49	2.21	0.82257	0.206632
CS-1_17	13.47	41.12	2.21	0.82257	0.206632
CS-1_17	11.75	14.37	2.21	0.82257	0.206632
CS-1_18	11.27	62.48	2.5	0.830045	0.261278
CS-1_19	11.44	77.75	2.53	0.835186	0.209619
CS-1_19	13.28	75.95	2.53	0.835186	0.209619
CS-1_19	12.81	50.79	2.53	0.835186	0.209619
CS-1_21	12.58	79.55	2.24	0.827012	0.251622
CS-1_21	13.53	56.83	2.24	0.827012	0.251622
CS-1_23	13.84	46.5	2.59	0.837703	0.239859
CS-1_24	10.36	62.53	2.69	0.833379	0.197603
CS-1_24	9.54	76.9	2.69	0.833379	0.197603
CS-1_24	11.79	75.09	2.69	0.833379	0.197603
CS-1_25	13.48	19.98	2.48	0.820259	0.241009
CS-1_26	12.53	71.62	2.33	0.840477	0.182427
CS-1_27	12.58	58.44	2.32	0.835452	0.232523
CS-1_27	13.06	79.27	2.32	0.835452	0.232523
CS-1_27	11.24	77	2.32	0.835452	0.232523
CS-1_27	13.58	61.79	2.32	0.835452	0.232523
CS-1_27	12.84	54.94	2.32	0.835452	0.232523
CS-1_28	10.83	76.53	2.61	0.814558	0.301818
CS-1_28	11.24	70.89	2.61	0.814558	0.301818
CS-1_28	13.67	13.8	2.61	0.814558	0.301818
CS-1_29	14.6	78.62	2.83	0.843181	0.1617
CS-1_30	11.66	43.07	2.54	0.832875	0.257578
CS-1_32	13.15	76.33	2.51	0.841002	0.168524
CS-1_32	14.06	53.43	2.51	0.841002	0.168524
CS-1_33	13.38	76.6	2.68	0.833249	0.181958
CS-1_33	10.87	63.53	2.68	0.833249	0.181958
CS-1_33	12.09	52.29	2.68	0.833249	0.181958
CS-1_33	12.4	47.74	2.68	0.833249	0.181958
CS-1_34	13.36	77.19	2.52	0.831401	0.278043
CS-1_35	12.8	29.79	2.61	0.837644	0.153544
CS-1_35	11.55	73.75	2.61	0.837644	0.153544
CS-1_35	13.98	41.55	2.61	0.837644	0.153544
CS-1_36	12.81	29.01	2.46	0.836847	0.160247
CS-1_37	10.12	59.03	2.43	0.831556	0.23633
CS-1_37	14.01	15.5	2.43	0.831556	0.23633
CS-1_38	5.8	49.44	2.65	0.830479	0.331025
CS-1_39	12.08	61.51	2.78	0.829671	0.179339
CS-1_39	14.2	67.28	2.78	0.829671	0.179339
CS-1_39	11.15	55.74	2.78	0.829671	0.179339
CS-1_39	13.16	67.24	2.78	0.829671	0.179339
CS-1_39	12.68	61.17	2.78	0.829671	0.179339
CS-1_39	7.02	25.67	2.78	0.829671	0.179339
CS-1_40	13.38	52.46	2.28	0.831694	0.245255
CS-1_40	12.74	41.17	2.28	0.831694	0.245255
CS-1_40	14.1	61.69	2.28	0.831694	0.245255
CS-1_40	11.17	47.14	2.28	0.831694	0.245255
CS-1_extra08	10.13	73.08	2.88
CS-1_extra09	6.53	83	2.73
CS-1_extra11	13.92	37.35	2.71
CS-1_extra11	12.74	53.24	2.71
CS-1_extra12	10.59	19.27	2.7
CS-1_extra13	11.73	52.39	2.65
CS-1_extra13	11.64	46.6	2.65
CS-1_extra23	13.55	66.11	2.59
CS-1_extra24	10.75	78.09	2.34
CS-1_extra24	14.04	39.77	2.34
CS-4_1	13.13	37.93	2.05	0.842449	0.070434
CS-4_1	8.54	62.74	2.05	0.842449	0.070434
CS-4_1	7.37	89.15	2.05	0.842449	0.070434
CS-4_1	12.21	48.21	2.05	0.842449	0.070434
CS-4_1	11.02	76.85	2.05	0.842449	0.070434
CS-4_1	10.83	85.1	2.05	0.842449	0.070434
CS-4_2	8.67	42.33	1.97
CS-4_2	10.37	54.39	1.97
CS-4_2	12.32	31.84	1.97
CS-4_2	12.44	17.88	1.97
CS-4_3	13.62	59.15	1.85	0.855425	0.058824
CS-4_3	12.54	69.95	1.85	0.855425	0.058824
CS-4_3	10.76	68.2	1.85	0.855425	0.058824
CS-4_3	7.83	12.51	1.85	0.855425	0.058824
CS-4_4	11.4	63.3	2.09	0.839691	0.102895
CS-4_4	11.93	55.66	2.09	0.839691	0.102895
CS-4_4	12.57	53.9	2.09	0.839691	0.102895
CS-4_4	13.37	80.16	2.09	0.839691	0.102895
CS-4_5	11.37	74.75	2.18	0.844062	0.062125
CS-4_5	12.67	72.9	2.18	0.844062	0.062125
CS-4_6	13.12	74.53	2.24	0.836164	0.07583
CS-4_6	13.4	43.14	2.24	0.836164	0.07583
CS-4_6	12.45	60.92	2.24	0.836164	0.07583
CS-4_6	12.18	65.18	2.24	0.836164	0.07583
CS-4_7	13.52	47.15	2.04	0.851809	0.062195
CS-4_7	14.61	53.75	2.04	0.851809	0.062195
CS-4_7	8.45	43.33	2.04	0.851809	0.062195
CS-4_7	13.52	50.57	2.04	0.851809	0.062195
CS-4_8	14.87	57.63	1.97	0.846801	0.058642
CS-4_9	14.69	10.85	2.1	0.850714	0.079192
CS-4_9	11.11	87.89	2.1	0.850714	0.079192
CS-4_9	12.36	76.35	2.1	0.850714	0.079192
CS-4_9	12.26	70.65	2.1	0.850714	0.079192
CS-4_9	13.27	72.73	2.1	0.850714	0.079192
CS-4_10	14.18	40.84	2.11	0.840802	0.128933
CS-4_11	12.19	68.82	2.08	0.852368	0.066543
CS-4_11	10.04	38.04	2.08	0.852368	0.066543
CS-4_11	11.3	65.31	2.08	0.852368	0.066543
CS-4_11	10.38	67.87	2.08	0.852368	0.066543
CS-4_11	12.34	68.58	2.08	0.852368	0.066543
CS-4_11	8.02	41.25	2.08	0.852368	0.066543
CS-4_11	13.95	23.19	2.08	0.852368	0.066543
CS-4_12	9.39	65.72	1.75	0.852973	0.048053
CS-4_12	11.1	56.15	1.75	0.852973	0.048053
CS-4_12	11.36	89.07	1.75	0.852973	0.048053
CS-4_13	15.25	34.28	2.07	0.851963	0.064032
CS-4_13	11.97	77.94	2.07	0.851963	0.064032
CS-4_13	8.51	71.43	2.07	0.851963	0.064032
CS-4_13	13.57	42.76	2.07	0.851963	0.064032
CS-4_13	8.17	42.51	2.07	0.851963	0.064032
CS-4_14	11.05	56.34	2.07	0.835369	0.035612
CS-4_14	12.99	76.05	2.07	0.835369	0.035612
CS-4_14	14.01	77.38	2.07	0.835369	0.035612
CS-4_15	11.64	66.69	2.33	0.84692	0.063158
CS-4_15	14.39	37.24	2.33	0.84692	0.063158
CS-4_15	13.31	33.53	2.33	0.84692	0.063158
CS-4_15	10.79	70.24	2.33	0.84692	0.063158
CS-4_15	10.33	66.49	2.33	0.84692	0.063158
CS-4_15	11.99	32.28	2.33	0.84692	0.063158
CS-4_15	11.91	57.25	2.33	0.84692	0.063158
CS-4_15	13.97	46.96	2.33	0.84692	0.063158
CS-4_15	13.31	34.13	2.33	0.84692	0.063158
CS-4_16	10.69	52.97	2	0.852934	0.060586
CS-4_16	9.12	77.72	2	0.852934	0.060586
CS-4_16	12.27	84.79	2	0.852934	0.060586
CS-4_16	9.72	69.67	2	0.852934	0.060586
CS-4_17	12.42	23.54	2.2	0.840764	0.048168
CS-4_17	10.46	62.02	2.2	0.840764	0.048168
CS-4_17	13.9	15.25	2.2	0.840764	0.048168
CS-4_17	9.55	84.26	2.2	0.840764	0.048168
CS-4_17	10.01	73.13	2.2	0.840764	0.048168
CS-4_17	12.76	37.57	2.2	0.840764	0.048168
CS-4_17	10.52	46.77	2.2	0.840764	0.048168
CS-4_17	13.77	55.09	2.2	0.840764	0.048168
CS-4_17	12.18	23.58	2.2	0.840764	0.048168
CS-4_17	12.63	29.96	2.2	0.840764	0.048168
CS-4_18	13.78	29.85	2.01	0.854392	0.054301
CS-4_18	13.95	12.62	2.01	0.854392	0.054301
CS-4_18	13.44	55.59	2.01	0.854392	0.054301
CS-4_19	13.01	20.25	2.05	0.837582	0.063878
CS-4_19	9.28	61.86	2.05	0.837582	0.063878
CS-4_19	13.69	51.46	2.05	0.837582	0.063878
CS-4_19	12.58	52.79	2.05	0.837582	0.063878
CS-4_20	12.45	26.95	2.04	0.846261	0.07196
CS-4_20	13.07	43.11	2.04	0.846261	0.07196
CS-4_20	14.03	85.62	2.04	0.846261	0.07196
CS-4_20	11.82	73.76	2.04	0.846261	0.07196
CS-4_22	13.17	65.66	2.21	0.842838	0.060239
CS-4_22	8.95	15.14	2.21	0.842838	0.060239
CS-4_24	11.93	8.25	2.05	0.851258	0.052706
CS-4_24	12.26	76.7	2.05	0.851258	0.052706
CS-4_25	14.55	44.04	2.03	0.855688	0.057186
CS-4_25	9.71	60.91	2.03	0.855688	0.057186
CS-4_25	10.1	79.87	2.03	0.855688	0.057186
CS-4_26	14.83	81.39	1.98	0.842055	0.080882
CS-4_27	12.59	64.51	2.21	0.856186	0.043768
CS-4_27	11.65	80.18	2.21	0.856186	0.043768
CS-4_27	11.69	82.95	2.21	0.856186	0.043768
CS-4_27	14.84	43.45	2.21	0.856186	0.043768
CS-4_27	13.17	41.05	2.21	0.856186	0.043768
CS-4_27	10.94	23.17	2.21	0.856186	0.043768
CS-4_27	10.99	73.84	2.21	0.856186	0.043768
CS-4_29	10.75	63.98	2.07	0.853257	0.046991
CS-4_29	9.33	82.09	2.07	0.853257	0.046991
CS-4_29	12.77	17.63	2.07	0.853257	0.046991
CS-4_29	12.74	44.59	2.07	0.853257	0.046991
CS-4_30	13.55	74.34	1.93	0.852978	0.084661
CS-4_31	10.54	67.24	2.19	0.847935	0.032472
CS-4_32	12.96	43.43	2.48	0.845375	0.061301
CS-4_32	9.62	56.49	2.48	0.845375	0.061301
CS-4_32	13.03	47.84	2.48	0.845375	0.061301
CS-4_32	12.84	50.5	2.48	0.845375	0.061301
CS-4_33	10.77	79.81	1.95	0.850361	0.047877
CS-4_33	9.27	57.51	1.95	0.850361	0.047877
CS-4_34	11.85	81.99	2.06	0.853146	0.080004
CS-4_35	13.17	46.32	1.91	0.851305	0.067131
CS-4_35	13.5	41.57	1.91	0.851305	0.067131
CS-4_35	9.59	76.82	1.91	0.851305	0.067131
CS-4_35	8.63	74.98	1.91	0.851305	0.067131
CS-4_36	11.63	69.19	2.22	0.851224	0.054093
CS-4_36	13.73	79.72	2.22	0.851224	0.054093
CS-4_38	12.01	70.96	1.93	0.849711	0.090109
CS-4_38	9.67	61.05	1.93	0.849711	0.090109
CS-4_40	12.76	62.74	2.02	0.841745	0.055242
CS-4_40	10.8	50.36	2.02	0.841745	0.055242
CS-4_40	13.69	86.2	2.02	0.841745	0.055242
CS-4_40	12.84	36.68	2.02	0.841745	0.055242
CS-5_1	12.37	51.23	2.46	0.835539	0.061129
CS-5_3	8.64	36.87	2.71	0.844585	0.032509
CS-5_3	12.4	61.78	2.71	0.844585	0.032509
CS-5_4	10.02	57.12	2.49	0.839081	0.066763
CS-5_4	10.89	63.26	2.49	0.839081	0.066763
CS-5_4	11.28	77.7	2.49	0.839081	0.066763
CS-5_4	11.29	71.08	2.49	0.839081	0.066763
CS-5_4	11.42	26.88	2.49	0.839081	0.066763
CS-5_4	12.99	60.61	2.49	0.839081	0.066763
CS-5_5	9.82	85.6	2.04	0.850147	0.047521
CS-5_6	10.7	50.64	2.33	0.844258	0.044541
CS-5_6	11.83	82.26	2.33	0.844258	0.044541
CS-5_7	8.84	37.54	2.36	0.84591	0.029971
CS-5_7	14.07	62.93	2.36	0.84591	0.029971
CS-5_10	9.62	68.8	2.23	0.845678	0.010162
CS-5_10	12.34	56.01	2.23	0.845678	0.010162
CS-5_10	14.23	43.97	2.23	0.845678	0.010162
CS-5_11	10.5	80.17	2.37	0.843218	0.0505
CS-5_11	11.91	16.53	2.37	0.843218	0.0505
CS-5_12	12.13	70.7	2.51	0.829114	0.077872
CS-5_12	13.06	89.64	2.51	0.829114	0.077872
CS-5_12	14.56	69.29	2.51	0.829114	0.077872
CS-5_17	8.98	9.93	2.59	0.838676	0.022829
CS-5_17	9.01	19.94	2.59	0.838676	0.022829
CS-5_17	11.51	64.57	2.59	0.838676	0.022829
CS-5_18	13.93	65.35	2.44	0.839959	0.041427
CS-5_19	13.97	82.57	2.25	0.851071	0.011429
CS-5_21	12.81	52.21	1.97	0.847359	0.052806
CS-5_22	10.25	78.28	2.41	0.846893	0.043433
CS-5_22	14.32	9.1	2.41	0.846893	0.043433
CS-5_23	10.76	67.65	2.15	0.840227	0.055485
CS-5_23	13.88	80.27	2.15	0.840227	0.055485
CS-5_25	12.12	26.86	2.61	0.841312	0.065281
CS-5_27	13.9	55.37	2.69	0.847025	0.009385
CS-5_32	10.83	38.91	2.65	0.849405	0.065427
CS-5_33	11	64.34	2.4	0.849217	0
CS-5_34	12.5	57.71	2.64	0.850134	0.029211
CS-5_34	13.14	51.7	2.64	0.850134	0.029211
CS-5_35	10.81	46.16	2.08	0.849842	0.025176
CS-5_35	11.22	34.48	2.08	0.849842	0.025176
CS-5_39	9.52	45.9	2.23	0.841387	0.017623
CS-5_39	11.66	83.95	2.23	0.841387	0.017623
CS-5_40	10.45	71.43	2.68
CS-5_40	11.88	65.66	2.68
CS-5_40	12.02	36.19	2.68
CS-5_40	12.18	74.24	2.68
CS-5_40	12.43	59.72	2.68
CS-5_extra04	14.11	41.05	2.67	0.830372	0.040489
CS-5_extra07	9.06	61.89	2.89	0.848775	0.044433
CS-5_extra07	14.02	12.26	2.89	0.848775	0.044433
CS-5_extra08	9	57.2	2.57	0.840378	0.043412
CS-5_extra08	14.45	40.13	2.57	0.840378	0.043412
CS-5_extra09	11.09	67.23	2.53	0.841824	0.029697
CS-5_extra09	12.55	72.37	2.53	0.841824	0.029697
CS-5_extra10	9.18	32.55	2.84	0.84904	0.006024
CS-5_extra100	10.1	61.46	2.46	0.852391	0.037546
CS-5_extra100	12.44	66.58	2.46	0.852391	0.037546
CS-5_extra114	9.09	62.24	2.27	0.832619	0.025429
CS-5_extra114	12.17	36.57	2.27	0.832619	0.025429
CS-5_extra114	12.87	39.39	2.27	0.832619	0.025429
CS-5_extra114	14.6	35.51	2.27	0.832619	0.025429
CS-5_extra17	12.3	79.31	2.36	0.84682	0.029297
CS-5_extra19	12.78	61.21	2.44	0.839881	0.02912
CS-5_extra19	13.26	16.37	2.44	0.839881	0.02912
CS-5_extra19	13.45	7.73	2.44	0.839881	0.02912
CS-5_extra20	12.84	26.1	2	0.849524	0.042911
CS-5_extra20	13.8	64.02	2	0.849524	0.042911
CS-5_extra21	9.69	60.2	2.22	0.842673	0.015835
CS-5_extra21	10.84	70.29	2.22	0.842673	0.015835
CS-5_extra27	11.96	67.72	2.63	0.841573	0.040966
CS-5_extra30	13.62	41.49	2.9	0.849279	0.026408
CS-5_extra34	12.67	72.83	2.43	0.849758	0
CS-5_extra37	9.15	77.31	2.35	0.829727	0.045945
CS-5_extra39	11.13	56.08	2.64	0.843736	0.045466
CS-5_extra39	13.96	63.44	2.64	0.843736	0.045466
CS-5_extra42	11.98	19.4	2.65	0.839697	0.010758
CS-5_extra42	12.51	45.43	2.65	0.839697	0.010758
CS-5_extra42	14.55	37.19	2.65	0.839697	0.010758
CS-5_extra43	10.45	18.07	2.4	0.845529	0.029908
CS-5_extra43	12.66	66.23	2.4	0.845529	0.029908
CS-5_extra43	13.06	14.94	2.4	0.845529	0.029908
CS-5_extra61	12.81	36.05	2.14	0.848511	0.026849
CS-5_extra69	10.21	68.01	2.5	0.84369	0.032269
CS-5_extra69	13.99	44.77	2.5	0.84369	0.032269
CS-5_extra76	13.12	53.84	2.34	0.835334	0.025964
CS-5_extra77	10.22	71.95	2.2	0.852322	0.027708
CS-5_extra80	11.66	59.24	2.21	0.856856	0.020546
CS-5_extra83	12.68	41.26	2	0.843036	0.028252
CS-5_extra89	8.92	72.11	2.47	0.837347	0.048187
CS-5_extra89	14.55	73.66	2.47	0.837347	0.048187
CS-5_extra92	13.43	50.92	2.36	0.834534	0.037211
CS-5_extra93	11.96	13.19	2.41	0.844308	0.058361
CS-5_extra93	14.15	64.08	2.41	0.844308	0.058361
CS-5_extra97	12.47	83.14	2.22	0.851761	0.065748
CS-5_extra98	8.75	78.4	2.45	0.843869	0.043618
CS-5_extra98	13.24	18.32	2.45	0.843869	0.043618
CS-5_extra99	12.93	69.14	2.47	0.848211	0.035928
CS-6_2	8.55	61.14	1.31	0.856238	0.015326
CS-6_3	8.83	62.39	1.47	0.848589	0.014957
CS-6_3	12.62	40.54	1.47	0.848589	0.014957
CS-6_3	13.66	7.48	1.47	0.848589	0.014957
CS-6_4	10.64	74.05	0.93	0.857057	0.00957
CS-6_7	9.73	89.24	1.27	0.854392	0.009154
CS-6_7	11.82	43.91	1.27	0.854392	0.009154
CS-6_8	9.36	68.9	1.32	0.844527	0.01232
CS-6_8	11.67	15.44	1.32	0.844527	0.01232
CS-6_9	10.99	22.14	1.49	0.852983	0.023029
CS-6_9	12.52	43.51	1.49	0.852983	0.023029
CS-6_9	13.15	34.21	1.49	0.852983	0.023029
CS-6_9	14.22	50.92	1.49	0.852983	0.023029
CS-6_9	14.29	49.2	1.49	0.852983	0.023029
CS-6_10	9.38	19.44	1.38	0.853859	0.000375
CS-6_10	11.79	79.62	1.38	0.853859	0.000375
CS-6_10	13.67	25.48	1.38	0.853859	0.000375
CS-6_12	8.85	63.88	1.38	0.849894	0.014187
CS-6_13	9.8	44.39	1.51	0.851458	0.022827
CS-6_13	9.89	66.26	1.51	0.851458	0.022827
CS-6_13	10.94	61.91	1.51	0.851458	0.022827
CS-6_13	11.43	56.85	1.51	0.851458	0.022827
CS-6_14	8.94	49.74	1.35
CS-6_14	9.72	37.86	1.35
CS-6_14	9.94	68.38	1.35
CS-6_14	11.56	36.76	1.35
CS-6_14	12.84	53.74	1.35
CS-6_14	14.19	74.63	1.35
CS-6_15	8.09	64.98	1.36	0.852564	0.019419
CS-6_15	10.03	27.99	1.36	0.852564	0.019419
CS-6_15	11.56	30.96	1.36	0.852564	0.019419
CS-6_15	12.76	62.75	1.36	0.852564	0.019419
CS-6_16	10.45	48.67	1.15	0.852426	0.005223
CS-6_16	12.17	32.8	1.15	0.852426	0.005223
CS-6_16	13.6	44.26	1.15	0.852426	0.005223
CS-6_17	11.1	52.34	1.35	0.863264	0.003485
CS-6_18	8.1	69.01	1.29	0.849867	0.006228
CS-6_18	9.63	61.88	1.29	0.849867	0.006228
CS-6_18	10.21	83.52	1.29	0.849867	0.006228
CS-6_18	10.61	80.01	1.29	0.849867	0.006228
CS-6_18	10.93	22.43	1.29	0.849867	0.006228
CS-6_18	11.89	72.27	1.29	0.849867	0.006228
CS-6_18	12.67	50.38	1.29	0.849867	0.006228
CS-6_18	13.99	47.44	1.29	0.849867	0.006228
CS-6_19	9.94	15.67	1.27	0.858168	0.030877
CS-6_19	10.62	41.41	1.27	0.858168	0.030877
CS-6_19	11.31	20.02	1.27	0.858168	0.030877
CS-6_19	12.2	78.96	1.27	0.858168	0.030877
CS-6_21	9.14	76.47	1.25
CS-6_21	9.46	74.2	1.25
CS-6_21	12.67	18.91	1.25
CS-6_23	12.77	23.07	1.2	0.850662	0.012394
CS-6_23	13.23	43.37	1.2	0.850662	0.012394
CS-6_24	9.7	65.95	1.48	0.854461	0.004709
CS-6_24	11.81	33.82	1.48	0.854461	0.004709
CS-6_24	11.92	40.14	1.48	0.854461	0.004709
CS-6_24	13.03	43.94	1.48	0.854461	0.004709
CS-6_25	8.28	83.41	1.16	0.857455	0.003173
CS-6_25	9.25	42.28	1.16	0.857455	0.003173
CS-6_25	10.3	23.67	1.16	0.857455	0.003173
CS-6_26	13.22	55.6	1.05	0.856306	0.023122
CS-6_26	13.48	48.55	1.05	0.856306	0.023122
CS-6_27	9.02	30.97	1.26	0.844656	0.016772
CS-6_27	9.19	51.17	1.26	0.844656	0.016772
CS-6_27	12.48	73.53	1.26	0.844656	0.016772
CS-6_27	12.99	45.78	1.26	0.844656	0.016772
CS-6_28	11.56	43.45	1.2	0.844317	0.001515
CS-6_28	11.87	65.59	1.2	0.844317	0.001515
CS-6_28	12.65	44.48	1.2	0.844317	0.001515
CS-6_29	13.02	18.73	1.48	0.852716	0.01708
CS-6_30	11.6	80.39	1.39	0.85866	0.009333
CS-6_30	12.8	74.4	1.39	0.85866	0.009333
CS-6_30	13.83	39.81	1.39	0.85866	0.009333
CS-6_31	12.07	80.29	1.13	0.853953	0.012675
CS-6_31	13.52	69.16	1.13	0.853953	0.012675
CS-6_32	11.23	67.38	1.08	0.85802	0.014356
CS-6_32	13.73	36.86	1.08	0.85802	0.014356
CS-6_33	11.97	28.11	1.31	0.855962	0.001991
CS-6_34	13.96	15.12	1.34	0.847994	0.015507
CS-6_35	11.02	32.02	1.4	0.846206	0.029058
CS-6_35	11.98	52.67	1.4	0.846206	0.029058
CS-6_35	12.51	57.01	1.4	0.846206	0.029058
CS-6_35	13.22	52.83	1.4	0.846206	0.029058
CS-6_35	13.23	73.12	1.4	0.846206	0.029058
CS-6_35	13.3	60.8	1.4	0.846206	0.029058
CS-6_36	11.15	38.66	1.31	0.845964	0.007911
CS-6_36	11.98	63.01	1.31	0.845964	0.007911
CS-6_36	13.97	37.65	1.31	0.845964	0.007911
CS-6_36	14.48	80.81	1.31	0.845964	0.007911
CS-6_37	11.2	41.57	1.15	0.85542	0.018516
CS-6_37	12.37	75.83	1.15	0.85542	0.018516
CS-6_37	12.42	46.74	1.15	0.85542	0.018516
CS-6_37	12.81	65.53	1.15	0.85542	0.018516
CS-6_37	13.01	66.55	1.15	0.85542	0.018516
CS-6_38	15.16	44.27	1.31	0.844241	0.00625
CS-6_39	14.07	79.93	1.45
CS-6_40	8.21	70.7	1.44	0.860095	0.011141
CS-6_40	9.55	78.21	1.44	0.860095	0.011141
CS-6_40	13.06	52.99	1.44	0.860095	0.011141
CS-8_1	11.57	44.98	2.39	0.811381	0.228078
CS-8_2	8.45	44.05	2.61	0.811349	0.24023
CS-8_2	8.98	76.22	2.61	0.811349	0.24023
CS-8_2	9.32	80.76	2.61	0.811349	0.24023
CS-8_2	9.36	50.35	2.61	0.811349	0.24023
CS-8_2	9.76	59.23	2.61	0.811349	0.24023
CS-8_2	10.23	55.52	2.61	0.811349	0.24023
CS-8_2	10.55	43.73	2.61	0.811349	0.24023
CS-8_2	10.74	83.9	2.61	0.811349	0.24023
CS-8_2	11.73	17.68	2.61	0.811349	0.24023
CS-8_3	8.03	81.39	2.4	0.819775	0.295017
CS-8_3	9.34	70.9	2.4	0.819775	0.295017
CS-8_3	10.89	34.19	2.4	0.819775	0.295017
CS-8_3	11.33	86.88	2.4	0.819775	0.295017
CS-8_3	11.65	83.06	2.4	0.819775	0.295017
CS-8_3	12.79	17.31	2.4	0.819775	0.295017
CS-8_4	11.6	45.83	2.55	0.844394	0.124591
CS-8_4	11.67	79.73	2.55	0.844394	0.124591
CS-8_4	12.17	19.08	2.55	0.844394	0.124591
CS-8_4	12.49	18.3	2.55	0.844394	0.124591
CS-8_5	10.95	78.56	2.37	0.82923	0.167241
CS-8_5	11.31	27.27	2.37	0.82923	0.167241
CS-8_5	12.9	65.06	2.37	0.82923	0.167241
CS-8_5	13.14	35.21	2.37	0.82923	0.167241
CS-8_5	13.37	52.03	2.37	0.82923	0.167241
CS-8_6	11.91	73.12	2.77	0.823678	0.220318
CS-8_6	11.91	35.55	2.77	0.823678	0.220318
CS-8_6	12.02	70.88	2.77	0.823678	0.220318
CS-8_6	12.77	71.11	2.77	0.823678	0.220318
CS-8_7	9.89	87.77	2.46	0.817153	0.258392
CS-8_7	10.9	75.87	2.46	0.817153	0.258392
CS-8_7	11.59	76.6	2.46	0.817153	0.258392
CS-8_7	11.92	46.77	2.46	0.817153	0.258392
CS-8_7	11.97	23.96	2.46	0.817153	0.258392
CS-8_7	12.06	46.26	2.46	0.817153	0.258392
CS-8_7	12.46	52	2.46	0.817153	0.258392
CS-8_7	12.46	52	2.46	0.817153	0.258392
CS-8_7	13.28	78.64	2.46	0.817153	0.258392
CS-8_8	12.05	79.99	2.5	0.822274	0.181003
CS-8_8	13.98	32.5	2.5	0.822274	0.181003
CS-8_10	11.19	34.97	2.31	0.827909	0.22549
CS-8_12	9.91	51.5	2.62	0.827813	0.199464
CS-8_12	10.33	48.75	2.62	0.827813	0.199464
CS-8_12	11.17	63.46	2.62	0.827813	0.199464
CS-8_12	13.08	56.24	2.62	0.827813	0.199464
CS-8_12	15.5	73.08	2.62	0.827813	0.199464
CS-8_13	9.88	72.77	2.58	0.822585	0.243407
CS-8_13	10.7	79.57	2.58	0.822585	0.243407
CS-8_13	10.8	64.19	2.58	0.822585	0.243407
CS-8_13	11.99	42.75	2.58	0.822585	0.243407
CS-8_13	12.18	85.77	2.58	0.822585	0.243407
CS-8_13	13.19	66.4	2.58	0.822585	0.243407
CS-8_14	10.38	72.24	2.79	0.833869	0.20702
CS-8_14	11.64	14.84	2.79	0.833869	0.20702
CS-8_14	11.86	25.53	2.79	0.833869	0.20702
CS-8_14	12.96	5.79	2.79	0.833869	0.20702
CS-8_14	13.64	86.2	2.79	0.833869	0.20702
CS-8_14	13.74	80.71	2.79	0.833869	0.20702
CS-8_15	9.76	65.23	2.56	0.830988	0.232952
CS-8_15	10.02	12.47	2.56	0.830988	0.232952
CS-8_15	12.21	67.23	2.56	0.830988	0.232952
CS-8_16	8.46	1.95	2.84	0.817616	0.239123
CS-8_16	10.3	79.5	2.84	0.817616	0.239123
CS-8_16	10.55	66.51	2.84	0.817616	0.239123
CS-8_16	12.35	34.51	2.84	0.817616	0.239123
CS-8_16	12.38	33.96	2.84	0.817616	0.239123
CS-8_16	12.54	83.24	2.84	0.817616	0.239123
CS-8_16	13.13	36.55	2.84	0.817616	0.239123
CS-8_16	15.27	52.17	2.84	0.817616	0.239123
CS-8_17	12.41	71.75	2.49
CS-8_17	13.66	44.08	2.49
CS-8_17	16.24	41.61	2.49
CS-8_18	8.51	16.66	2.74	0.829054	0.252336
CS-8_18	11.27	73.89	2.74	0.829054	0.252336
CS-8_18	12.09	79.4	2.74	0.829054	0.252336
CS-8_18	12.86	48.52	2.74	0.829054	0.252336
CS-8_18	13.37	77.47	2.74	0.829054	0.252336
CS-8_18	13.89	64.01	2.74	0.829054	0.252336
CS-8_18	14.48	37.97	2.74	0.829054	0.252336
CS-8_18	16.06	75.16	2.74	0.829054	0.252336
CS-8_19	10.89	85.8	2.79	0.822727	0.249632
CS-8_19	11.85	69.61	2.79	0.822727	0.249632
CS-8_20	12.55	38.44	2.67	0.828236	0.179699
CS-8_20	14.5	4.23	2.67	0.828236	0.179699
CS-8_21	13.03	55.47	2.36	0.835302	0.204259
CS-8_22	11.51	72.63	2.47	0.821459	0.191458
CS-8_22	11.96	47.68	2.47	0.821459	0.191458
CS-8_22	12.3	31.79	2.47	0.821459	0.191458
CS-8_22	13.5	41.85	2.47	0.821459	0.191458
CS-8_23	12.77	55.05	2.55	0.830199	0.20069
CS-8_24	10.48	63.06	2.5
CS-8_24	13.11	34.89	2.5
CS-8_24	13.44	38.52	2.5
CS-8_24	14.68	34.5	2.5
CS-8_25	9.42	74.97	2.63	0.823562	0.179314
CS-8_25	12.67	53.47	2.63	0.823562	0.179314
CS-8_25	13.12	80.61	2.63	0.823562	0.179314
CS-8_25	13.6	65.54	2.63	0.823562	0.179314
CS-8_26	10.05	55.45	2.75	0.83315	0.157751
CS-8_26	10.38	60.2	2.75	0.83315	0.157751
CS-8_26	10.74	59.41	2.75	0.83315	0.157751
CS-8_26	13.79	25.99	2.75	0.83315	0.157751
CS-8_26	14.16	20.36	2.75	0.83315	0.157751
CS-8_27	10.8	59.05	2.69	0.822987	0.187049
CS-8_27	12.31	77.22	2.69	0.822987	0.187049
CS-8_27	12.53	65	2.69	0.822987	0.187049
CS-8_28	10.63	56.28	2.36	0.834257	0.177982
CS-8_29	9.08	83.22	2.59	0.8284	0.196183
CS-8_29	11.5	50.08	2.59	0.8284	0.196183
CS-8_29	12.04	56.52	2.59	0.8284	0.196183
CS-8_29	12.19	30.2	2.59	0.8284	0.196183
CS-8_29	12.75	61.56	2.59	0.8284	0.196183
CS-8_29	13.1	62.55	2.59	0.8284	0.196183
CS-8_29	13.59	27.3	2.59	0.8284	0.196183
CS-8_30	12.97	57.69	2.74	0.825092	0.185289
CS-8_31	8.51	68.24	2.57	0.833737	0.160874
CS-8_31	10.12	56.35	2.57	0.833737	0.160874
CS-8_31	11.38	67.62	2.57	0.833737	0.160874
CS-8_31	12.75	18.1	2.57	0.833737	0.160874
CS-8_33	11.93	45.69	2.45	0.817203	0.196226
CS-8_33	13.59	62.82	2.45	0.817203	0.196226
CS-8_34	11.49	81.72	2.52	0.829927	0.223545
CS-8_34	11.85	72.88	2.52	0.829927	0.223545
CS-8_35	12.28	13.45	2.29	0.84054	0.142985
CS-8_35	12.76	78.04	2.29	0.84054	0.142985
CS-8_36	11.27	51.05	2.5	0.821095	0.216932
CS-8_37	12.31	84.8	2.4	0.835125	0.226329
CS-8_37	13.94	38.76	2.4	0.835125	0.226329
CS-8_38	13.42	46.57	2.32	0.822804	0.232889
CS-8_38	13.5	21.59	2.32	0.822804	0.232889
CS-8_38	14.95	76.65	2.32	0.822804	0.232889
CS-8_38	15.11	60.16	2.32	0.822804	0.232889
CS-8_40	9.7	66.21	2.35	0.830258	0.221075
CS-8_40	11.18	31.98	2.35	0.830258	0.221075
CS-8_40	11.38	68.1	2.35	0.830258	0.221075
CS-8_40	11.55	30.19	2.35	0.830258	0.221075
CS-8_40	12.48	56.94	2.35	0.830258	0.221075
CS-8_40	12.99	36.86	2.35	0.830258	0.221075
CS-8_40	13.46	40.06	2.35	0.830258	0.221075
CS-9_1	13.39	9.36	2.2	0.850263	0.013065
CS-9_1	14.78	0.71	2.2	0.850263	0.013065
CS-9_2	10.83	68.63	2.33	0.851755	0.032238
CS-9_3	11.38	28.35	2.21	0.85544	0.005186
CS-9_3	12.89	65.52	2.21	0.85544	0.005186
CS-9_5	13.48	72.1	2.55	0.850384	0.023329
CS-9_6	11.8	71.74	2.09	0.855044	0.004958
CS-9_6	13.59	55.49	2.09	0.855044	0.004958
CS-9_7	9.41	28.15	2.36	0.852514	0.024895
CS-9_8	10.65	67.14	2.54	0.851591	0.014747
CS-9_8	13.5	76.02	2.54	0.851591	0.014747
CS-9_9	10.02	31.79	1.9	0.850076	0.019259
CS-9_10	12.32	35.77	2.33	0.855505	0
CS-9_10	13.46	86.25	2.33	0.855505	0
CS-9_12	8.31	32.01	2.06	0.854101	0.012993
CS-9_13	14.33	33.53	1.95	0.853751	0.017706
CS-9_15	8.92	62.21	2.16	0.850655	0.019236
CS-9_15	9.03	56.97	2.16	0.850655	0.019236
CS-9_15	9.15	77.47	2.16	0.850655	0.019236
CS-9_15	12.62	16.03	2.16	0.850655	0.019236
CS-9_16	11.28	37.93	2.56	0.850912	0.026609
CS-9_16	12.24	12.19	2.56	0.850912	0.026609
CS-9_17	8.96	40.15	2.27	0.849293	0.003695
CS-9_18	10.55	48	2.36	0.851197	0.00519
CS-9_18	12.5	41.61	2.36	0.851197	0.00519
CS-9_18	13.1	48.99	2.36	0.851197	0.00519
CS-9_19	14.93	52.44	2.39	0.853362	0.013067
CS-9_20	9.29	18.44	2.34	0.850193	0.031008
CS-9_20	12.94	58.96	2.34	0.850193	0.031008
CS-9_20	13.88	35.41	2.34	0.850193	0.031008
CS-9_21	13.46	76.39	2.16	0.845368	0.028619
CS-9_21	14.74	81.33	2.16	0.845368	0.028619
CS-9_22	8.01	58.85	2.35	0.844399	0.025221
CS-9_22	9.23	44.97	2.35	0.844399	0.025221
CS-9_23	9.66	61.64	2.19	0.857137	0.03001
CS-9_23	12.86	23.15	2.19	0.857137	0.03001
CS-9_23	13.2	30.72	2.19	0.857137	0.03001
CS-9_23	15.39	14.56	2.19	0.857137	0.03001
CS-9_25	11.32	54.94	2.24	0.855531	0.000882
CS-9_27	11.21	74.58	2.19	0.857953	0.029961
CS-9_27	13.86	26.68	2.19	0.857953	0.029961
CS-9_28	13.85	37.99	2	0.857235	0.008429
CS-9_31	13.86	51.38	2.35	0.85724	0.020838
CS-9_33	12.04	71.62	1.99	0.859775	0
CS-9_33	13.26	21.35	1.99	0.859775	0
CS-9_33	13.81	50.48	1.99	0.859775	0
CS-9_33	13.92	30.04	1.99	0.859775	0
CS-9_34	12.89	21.85	1.95	0.856024	0.040755
CS-9_37	13.83	23.27	2.14	0.853803	0.014355
CS-9_38	8.6	40.07	2.43
CS-9_38	10.64	36.84	2.43
CS-9_38	12.29	34.69	2.43
CS-9_38	12.33	74.27	2.43
CS-9_38	14.97	49.33	2.43
CS-9_39	10.46	30.43	2.22	0.858309	0.000821
CS-9_extra02	8.24	65.64	2.31	0.848427	0.006736
CS-9_extra02	9.06	64.14	2.31	0.848427	0.006736
CS-9_extra02	9.1	47.41	2.31	0.848427	0.006736
CS-9_extra02	14.66	76.77	2.31	0.848427	0.006736
CS-9_extra05	8.64	63.72	2.13	0.859449	0.029926
CS-9_extra05	14.23	38.2	2.13	0.859449	0.029926
CS-9_extra08	9.86	74.32	1.98	0.854468	0.003838
CS-9_extra08	13.54	28.36	1.98	0.854468	0.003838
CS-9_extra12	9	60.61	2.2	0.854471	0.00548
CS-9_extra12	9.43	49.12	2.2	0.854471	0.00548
CS-9_extra12	10.82	53.17	2.2	0.854471	0.00548
CS-9_extra13	9.53	79.33	2.38	0.857865	0.023646
CS-9_extra13	10.64	47.8	2.38	0.857865	0.023646
CS-9_extra13	12.51	36.87	2.38	0.857865	0.023646
CS-9_extra21	13.67	83.53	2.59	0.849193	0.023718
CS-9_extra32	13.74	57.18	2.17	0.859899	0.002333
CS-9_extra33	11.22	76.4	2.21	0.851988	0.011245
CS-9_extra33	14.3	42.96	2.21	0.851988	0.011245
CS-9_extra36	9.07	82.59	2.44	0.84818	0.022276
CS-9_extra36	12.72	45.78	2.44	0.84818	0.022276
CS-9_extra36	12.91	47.19	2.44	0.84818	0.022276
CS-9_extra37	12.65	70.93	2.15	0.849497	0.02384
CS-9_extra39	11.95	58.31	2.63	0.847748	0.038626
CS-9_extra39	12.03	57.35	2.63	0.847748	0.038626
CS-9_extra39	12.9	81.66	2.63	0.847748	0.038626
CS-9_extra42	8.4	30.87	2.57	0.857616	0.009536
CS-9_extra42	11.47	42.72	2.57	0.857616	0.009536
CS-9_extra50	11.48	76.54	2.2	0.846814	0.031312
CS-9_extra50	11.5	58.71	2.2	0.846814	0.031312
CS-9_extra54	11.95	35.48	2.27	0.838687	0.009424
CS-9_extra54	12.68	46.33	2.27	0.838687	0.009424
CS-9_extra54	13.67	38.56	2.27	0.838687	0.009424
CS-9_extra74	13.35	41.89	2	0.857576	0.017661
CS-9_extra83	12.92	39.04	2.11	0.856992	0.022241
CS-9_extra88	8.72	59.89	2.05	0.850992	0.012894
CS-10_1	11.57	80.65	1.63	0.848006	0.057284
CS-10_1	11.67	46.69	1.63	0.848006	0.057284
CS-10_2	9.45	19.81	1.86	0.852279	0.02891
CS-10_2	13.54	72.96	1.86	0.852279	0.02891
CS-10_3	10.91	24.75	1.7	0.851405	0.067788
CS-10_4	9.01	48.66	1.91	0.85204	0.036273
CS-10_5	8.25	49.82	1.78	0.845986	0.047419
CS-10_6	9.17	39.64	1.76	0.847602	0.024781
CS-10_6	11.47	64.09	1.76	0.847602	0.024781
CS-10_6	12.73	62.39	1.76	0.847602	0.024781
CS-10_6	13.16	71.22	1.76	0.847602	0.024781
CS-10_6	13.42	58.73	1.76	0.847602	0.024781
CS-10_7	11.2	85.41	1.62	0.857835	0.009582
CS-10_9	10.12	47.48	1.71	0.847107	0.039853
CS-10_9	11.79	76.79	1.71	0.847107	0.039853
CS-10_10	14.24	17.83	1.93	0.84976	0.084336
CS-10_11	13.53	84.41	1.79	0.846337
CS-10_12	11.73	85.46	1.7	0.845251	0.020028
CS-10_12	13.56	81.71	1.7	0.845251	0.020028
CS-10_13	8.75	63.37	1.88	0.844587	0.015621
CS-10_15	10.62	49.53	1.54	0.849837	0.023187
CS-10_16	8.89	56.61	1.82	0.831621	0.076326
CS-10_16	11.02	58.92	1.82	0.831621	0.076326
CS-10_16	11.32	52.27	1.82	0.831621	0.076326
CS-10_16	11.62	48.72	1.82	0.831621	0.076326
CS-10_17	8.55	28.26	1.65	0.857758	0.01581
CS-10_17	9.43	45.98	1.65	0.857758	0.01581
CS-10_17	10.37	80.19	1.65	0.857758	0.01581
CS-10_17	13.31	42.94	1.65	0.857758	0.01581
CS-10_19	10.08	66.78	1.8	0.846774	0.006647
CS-10_20	10.69	74.38	1.87	0.849348	0.061681
CS-10_22	11.48	77.27	1.71	0.853928	0.015662
CS-10_22	12.68	53.61	1.71	0.853928	0.015662
CS-10_23	12.73	57.7	1.81	0.849936	0.024862
CS-10_24	8.06	39.98	2.01	0.840961	0.033519
CS-10_24	11.97	41.34	2.01	0.840961	0.033519
CS-10_24	12.12	64.32	2.01	0.840961	0.033519
CS-10_25	11.45	36.79	1.87	0.843021	0.052353
CS-10_25	12.43	46	1.87	0.843021	0.052353
CS-10_26	9.9	75.05	1.97	0.837174	0.042962
CS-10_26	9.99	30.18	1.97	0.837174	0.042962
CS-10_26	10.22	86.51	1.97	0.837174	0.042962
CS-10_26	10.48	28.99	1.97	0.837174	0.042962
CS-10_26	12.7	56.79	1.97	0.837174	0.042962
CS-10_26	13.4	57.83	1.97	0.837174	0.042962
CS-10_26	13.42	47.56	1.97	0.837174	0.042962
CS-10_26	14.03	26.27	1.97	0.837174	0.042962
CS-10_27	8.08	75.32	1.9	0.854224	0.006643
CS-10_27	8.75	75.57	1.9	0.854224	0.006643
CS-10_27	11.01	73.16	1.9	0.854224	0.006643
CS-10_28	12.84	45.1	1.71	0.843387	0.027938
CS-10_31	9.36	54.14	1.84	0.84954	0.042842
CS-10_31	10.34	62.11	1.84	0.84954	0.042842
CS-10_31	10.74	40.07	1.84	0.84954	0.042842
CS-10_31	11.1	49.28	1.84	0.84954	0.042842
CS-10_32	13.31	71.51	1.87	0.845765	0.01854
CS-10_32	13.51	54.44	1.87	0.845765	0.01854
CS-10_34	10.32	42.36	2	0.845161	0.03566
CS-10_38	9.12	53.21	1.76	0.846156	0.012682
CS-10_38	12.25	81.3	1.76	0.846156	0.012682
CS-10_39	10.94	22.24	2.09	0.853606	0.057064
CS-10_39	11.15	70.91	2.09	0.853606	0.057064
CS-10_39	12.21	68.5	2.09	0.853606	0.057064
CS-10_39	12.9	55.32	2.09	0.853606	0.057064
CS-10_39	12.95	73.83	2.09	0.853606	0.057064
CS-10_40	8.04	41.56	2.01	0.849869
CS-10_40	13.01	49.15	2.01	0.849869
CS-10_40	13.48	22.54	2.01	0.849869
CS-10_extra100	13.98	19.91	1.95
CS-10_extra102	9.94	38.26	1.69
CS-10_extra156	9.46	79.86	1.95
CS-10_extra156	13.24	37.04	1.95
CS-10_extra157	9.92	55.91	1.81
CS-10_extra157	10.96	59.54	1.81
CS-10_extra161	12.13	12.54	2.11
CS-10_extra161	12.4	17.67	2.11
CS-10_extra161	12.49	59.14	2.11
CS-10_extra162	11.14	67.56	1.9
CS-10_extra165	10.83	61.39	1.88
CS-10_extra168	13.62	7.14	2.09
CS-10_extra169	11.43	70.68	2.23
CS-10_extra171	8.71	46.48	2.3
CS-10_extra173	9.23	71.31	2.22
CS-10_extra173	13.5	50.13	2.22
CS-10_extra173	13.63	52.51	2.22
CS-10_extra173	13.64	35.55	2.22
CS-10_extra31	11.62	67.01	1.64
CS-10_extra33	12.73	44.22	1.63
CS-10_extra35	8.54	53.51	1.75
CS-10_extra53	11.93	58.97	1.81
CS-10_extra56	14.92	24.65	2.21
CS-10_extra57	8.23	76.15	1.89
CS-10_extra78	12.59	45.46	1.86
CS-10_extra78	12.73	82.59	1.86
CS-10_extra85	12.81	49.78	2.16
CS-10_extra86	12.55	31.99	2.03
CS-10_extra92	11.17	68.84	1.73
CS-10_extra99	11.7	57.42	1.76
CS-10_extra99	14.31	60.11	1.76
CS-11_2	10.25	42.29	1.81
CS-11_2	10.34	50.67	1.81
CS-11_2	12.03	79.22	1.81
CS-11_3	9.65	73.16	1.7
CS-11_3	10.14	42.27	1.7
CS-11_3	10.44	60.95	1.7
CS-11_3	10.77	70.26	1.7
CS-11_3	10.99	63.96	1.7
CS-11_3	11.68	52.45	1.7
CS-11_3	12.25	67.27	1.7
CS-11_3	12.52	74.21	1.7
CS-11_3	13.02	84.68	1.7
CS-11_3	13.35	13.32	1.7
CS-11_3	13.55	77.14	1.7
CS-11_3	13.67	46.05	1.7
CS-11_3	14.56	60.94	1.7
CS-11_4	8.51	72.92	1.71	0.686748	0.046017
CS-11_4	8.58	67.01	1.71	0.686748	0.046017
CS-11_4	10.11	58.7	1.71	0.686748	0.046017
CS-11_4	12.52	75.28	1.71	0.686748	0.046017
CS-11_4	13.38	28.04	1.71	0.686748	0.046017
CS-11_5	9.77	57.77	1.64	0.789887	0.017004
CS-11_5	12.56	71.97	1.64	0.789887	0.017004
CS-11_5	13.19	80.96	1.64	0.789887	0.017004
CS-11_6	8.6	82	1.86	0.79497	0.03411
CS-11_6	8.82	69.05	1.86	0.79497	0.03411
CS-11_6	10.47	70.18	1.86	0.79497	0.03411
CS-11_6	12.7	56.32	1.86	0.79497	0.03411
CS-11_6	13.62	56.86	1.86	0.79497	0.03411
CS-11_6	14.1	40.92	1.86	0.79497	0.03411
CS-11_7	10.58	73.8	1.8	0.73791	0.018742
CS-11_7	11.33	77.1	1.8	0.73791	0.018742
CS-11_7	13.28	66.21	1.8	0.73791	0.018742
CS-11_7	13.46	0	1.8	0.73791	0.018742
CS-11_8	11.69	65.53	1.8	0.801904	0.020299
CS-11_8	12.07	67.84	1.8	0.801904	0.020299
CS-11_8	13.1	56.1	1.8	0.801904	0.020299
CS-11_8	14.42	22.03	1.8	0.801904	0.020299
CS-11_9	10.38	64.04	1.58	0.84141	0.000336
CS-11_9	10.49	16.88	1.58	0.84141	0.000336
CS-11_9	13.01	67.66	1.58	0.84141	0.000336
CS-11_10	10.76	45.52	1.61	0.769525	0.054128
CS-11_10	10.79	0	1.61	0.769525	0.054128
CS-11_10	11.77	37.34	1.61	0.769525	0.054128
CS-11_10	12.15	78.38	1.61	0.769525	0.054128
CS-11_10	13.61	42.33	1.61	0.769525	0.054128
CS-11_11	10.45	43.66	1.69	0.739637	0.05083
CS-11_11	10.84	63.33	1.69	0.739637	0.05083
CS-11_11	10.87	45.28	1.69	0.739637	0.05083
CS-11_11	11.11	83.52	1.69	0.739637	0.05083
CS-11_11	12.21	72.2	1.69	0.739637	0.05083
CS-11_11	12.94	62.29	1.69	0.739637	0.05083
CS-11_11	13.21	37.47	1.69	0.739637	0.05083
CS-11_13	8.65	45.75	1.64	0.795977	0.020136
CS-11_13	8.65	46.99	1.64	0.795977	0.020136
CS-11_13	10.23	51.68	1.64	0.795977	0.020136
CS-11_13	12.77	87.97	1.64	0.795977	0.020136
CS-11_13	13.73	53.56	1.64	0.795977	0.020136
CS-11_14	12.29	33.9	1.64	0.780592	0.050743
CS-11_14	12.69	35.12	1.64	0.780592	0.050743
CS-11_14	13.21	34.83	1.64	0.780592	0.050743
CS-11_14	13.32	63.09	1.64	0.780592	0.050743
CS-11_14	13.59	69.41	1.64	0.780592	0.050743
CS-11_16	9.77	64.61	1.7	0.684487	0.054961
CS-11_16	11.12	57.02	1.7	0.684487	0.054961
CS-11_16	12.46	63.26	1.7	0.684487	0.054961
CS-11_16	12.84	62.21	1.7	0.684487	0.054961
CS-11_16	13.67	62.11	1.7	0.684487	0.054961
CS-11_16	14.37	63.71	1.7	0.684487	0.054961
CS-11_18	11.67	41.83	1.4
CS-11_18	12.21	75.14	1.4
CS-11_18	12.93	68.04	1.4
CS-11_18	13.78	57.92	1.4
CS-11_19	9.06	67.09	1.64	0.808883	0.033825
CS-11_20	10.88	64.9	1.82	0.813272	0.017052
CS-11_20	11.3	46.6	1.82	0.813272	0.017052
CS-11_21	9.04	40.64	1.66
CS-11_21	9.19	76.86	1.66
CS-11_21	11.66	69.43	1.66
CS-11_21	11.88	66.19	1.66
CS-11_21	12.67	77.38	1.66
CS-11_21	14.08	76.05	1.66
CS-11_22	12.7	35.54	1.64
CS-11_23	8.33	67.34	1.63	0.795719	0.027722
CS-11_23	8.86	36.93	1.63	0.795719	0.027722
CS-11_23	12.32	64.63	1.63	0.795719	0.027722
CS-11_23	12.73	76.74	1.63	0.795719	0.027722
CS-11_24	12.28	33.58	1.69	0.785274	0.044173
CS-11_25	9.72	76.74	1.94	0.749447	0.052012
CS-11_25	10.46	59.62	1.94	0.749447	0.052012
CS-11_25	11.6	71.44	1.94	0.749447	0.052012
CS-11_25	12.78	77.52	1.94	0.749447	0.052012
CS-11_25	12.85	40.17	1.94	0.749447	0.052012
CS-11_27	9.23	70.78	1.79	0.773797	0.023538
CS-11_27	11.02	56.21	1.79	0.773797	0.023538
CS-11_32	11.01	45.84	1.79	0.77744	0.03125
CS-11_32	13.13	76.15	1.79	0.77744	0.03125
CS-11_33	10.15	22.05	1.84	0.737543	0.045117
CS-11_33	12.1	58.28	1.84	0.737543	0.045117
CS-11_33	13.89	72.17	1.84	0.737543	0.045117
CS-12_1	8.02	77.36	1.42	0.78537	0.021833
CS-12_1	9.4	70.08	1.42	0.78537	0.021833
CS-12_1	11.99	15.38	1.42	0.78537	0.021833
CS-12_1	12.58	24.81	1.42	0.78537	0.021833
CS-12_1	13.3	63.46	1.42	0.78537	0.021833
CS-12_1	13.58	17.12	1.42	0.78537	0.021833
CS-12_2	12.12	57.46	1.48
CS-12_2	13.44	23.16	1.48
CS-12_3	11.85	32.94	1.32	0.828095	0.021932
CS-12_4	10.59	45.17	1.41	0.773102	0.027789
CS-12_5	11.12	46.88	1.5	0.77627	0.040224
CS-12_7	11.09	61.02	1.45	0.748843	0.023198
CS-12_7	11.18	43.45	1.45	0.748843	0.023198
CS-12_7	11.22	52.03	1.45	0.748843	0.023198
CS-12_7	12.5	56.69	1.45	0.748843	0.023198
CS-12_8	11.17	60.06	1.43	0.775187	0.042152
CS-12_8	11.82	56.73	1.43	0.775187	0.042152
CS-12_8	13.15	55.07	1.43	0.775187	0.042152
CS-12_8	14.55	23.32	1.43	0.775187	0.042152
CS-12_9	9.44	67.14	1.51	0.759973	0.029405
CS-12_9	10.2	49.03	1.51	0.759973	0.029405
CS-12_9	14.14	41.79	1.51	0.759973	0.029405
CS-12_11	12.5	23.36	1.54	0.754341	0.042143
CS-12_12	12.74	77.6	1.33	0.801829	0.021917
CS-12_13	12.04	73.36	1.22	0.778558	0.049598
CS-12_13	12.19	72.67	1.22	0.778558	0.049598
CS-12_13	12.32	63.01	1.22	0.778558	0.049598
CS-12_13	12.57	83.23	1.22	0.778558	0.049598
CS-12_13	13.51	80.12	1.22	0.778558	0.049598
CS-12_13	13.66	50.49	1.22	0.778558	0.049598
CS-12_14	12.5	55.08	1.58	0.78495	0.02663
CS-12_14	14.14	40.76	1.58	0.78495	0.02663
CS-12_15	12.48	44.38	1.47	0.790112	0.034364
CS-12_15	13.28	61.53	1.47	0.790112	0.034364
CS-12_16	9.34	65.14	1.44	0.757114	0.024886
CS-12_16	9.68	61.83	1.44	0.757114	0.024886
CS-12_16	11.24	58.37	1.44	0.757114	0.024886
CS-12_16	11.36	62.56	1.44	0.757114	0.024886
CS-12_16	13.3	22.34	1.44	0.757114	0.024886
CS-12_16	13.35	60.19	1.44	0.757114	0.024886
CS-12_17	10.6	70.34	1.28	0.771202	0.03426
CS-12_17	10.83	49.93	1.28	0.771202	0.03426
CS-12_17	11.33	49.5	1.28	0.771202	0.03426
CS-12_17	11.35	44.15	1.28	0.771202	0.03426
CS-12_17	12.86	52.34	1.28	0.771202	0.03426
CS-12_17	12.94	67.31	1.28	0.771202	0.03426
CS-12_17	13.6	77.62	1.28	0.771202	0.03426
CS-12_18	10.57	75.91	1.25	0.81943	0.003866
CS-12_19	9.62	59.7	1.47	0.808403	0.01745
CS-12_20	11.51	67.09	1.41	0.779251	0.023556
CS-12_21	11.35	32.75	1.3	0.765713	0.017354
CS-12_21	12.88	63.87	1.3	0.765713	0.017354
CS-12_21	14.24	44.85	1.3	0.765713	0.017354
CS-12_22	10	57.99	1.56	0.743805	0.031204
CS-12_22	12.33	78.16	1.56	0.743805	0.031204
CS-12_24	11.56	79.56	1.14	0.762538	0.015906
CS-12_24	14.21	43.74	1.14	0.762538	0.015906
CS-12_26	9.93	75.24	1.49	0.746147	0.023387
CS-12_26	13.78	36.1	1.49	0.746147	0.023387
CS-12_28	10.37	39.32	1.29	0.859897	0.011451
CS-12_29	9.52	27.61	1.5	0.771058	0.02653
CS-12_29	13.46	73.82	1.5	0.771058	0.02653
CS-12_30	10.43	62.53	1.37	0.769296	0.008238
CS-12_30	11.03	57.83	1.37	0.769296	0.008238
CS-12_31	12.37	28.51	1.34	0.770535	0.017412
CS-12_32	9.8	68.61	1.49	0.741386	0.07104
CS-12_32	12.24	65.32	1.49	0.741386	0.07104
CS-12_32	12.68	27.32	1.49	0.741386	0.07104
CS-12_32	13.08	69.01	1.49	0.741386	0.07104
CS-12_32	15.02	47.99	1.49	0.741386	0.07104
CS-12_33	12.46	38.66	1.33	0.78832	0.012893
CS-12_35	9.5	71.93	1.49	0.757775	0.022083
CS-12_35	10.05	56.08	1.49	0.757775	0.022083
CS-12_35	10.19	67.51	1.49	0.757775	0.022083
CS-12_35	13.71	82.56	1.49	0.757775	0.022083
CS-12_35	13.93	58.37	1.49	0.757775	0.022083
CS-12_36	12.25	76.33	1.36	0.866328	0
CS-12_37	10.13	53.91	1.51	0.770784	0.01738
CS-12_37	11.59	64.34	1.51	0.770784	0.01738
CS-12_37	12.25	56.14	1.51	0.770784	0.01738
CS-12_37	12.57	63.91	1.51	0.770784	0.01738
CS-12_38	12.63	62.61	1.6	0.783402	0.024861
CS-12_38	14.21	21.85	1.6	0.783402	0.024861
CS-12_40	12.33	31.67	1.43	0.795071	0.038545
CS-12_40	14.02	71	1.43	0.795071	0.038545
CS-12_extra02	10.09	87.21	1.44
CS-12_extra02	12.76	79.94	1.44
CS-12_extra07	11.06	63.07	1.57	0.749168	0.026531
CS-12_extra07	11.76	64.15	1.57	0.749168	0.026531
CS-12_extra07	13.41	49.89	1.57	0.749168	0.026531
CS-12_extra10	13.19	62.48	1.88	0.78208	0.024959
CS-12_extra10	15.14	72.53	1.88	0.78208	0.024959
CS-12_extra20	8.87	69.1	1.52	0.786811	0.041887
CS-12_extra20	14.35	84.22	1.52	0.786811	0.041887
CS-12_extra23	15.24	47.83	1.65	0.783994	0.028152
CS-12_extra26	13.41	78.78	1.46	0.817463	0.029517
CS-12_extra26	13.77	75.9	1.46	0.817463	0.029517
CS-12_extra28	12.9	84.14	1.63	0.760007	0.037481
CS-12_extra29	9.97	40.08	1.53	0.772176	0.009818
CS-12_extra29	11.87	8.34	1.53	0.772176	0.009818
CS-12_extra32	10.38	33.67	1.44	0.768021	0.017319
CS-12_extra32	10.71	42.19	1.44	0.768021	0.017319
CS-12_extra32	13.01	83.93	1.44	0.768021	0.017319
PV-1_3	11.62	62.65	1.51	0.749354	0.172787
PV-1_6	11.94	24.52	1.36	0.748929	0.146581
PV-1_10	10.33	68.72	1.54	0.747108	0.194075
PV-1_10	12.59	72.03	1.54	0.747108	0.194075
PV-1_11	13.85	43.5	1.51	0.748725	0.195705
PV-1_12	12.5	70.28	1.6	0.723081	0.192849
PV-1_13	11.56	43.52	1.35	0.778132	0.220501
PV-1_13	11.73	81.57	1.35	0.778132	0.220501
PV-1_13	12.58	82.83	1.35	0.778132	0.220501
PV-1_15	11.93	66.51	2.11	0.75994	0.238341
PV-1_19	12.31	72.49	1.6	0.764217	0.154299
PV-1_24	13.19	40.33	1.7	0.723045	0.159432
PV-1_24	13.66	52.72	1.7	0.723045	0.159432
PV-1_33	9.52	33.69	2.05	0.754164	0.17411
PV-1_33	9.92	61.54	2.05	0.754164	0.17411
PV-1_33	12.64	58.59	2.05	0.754164	0.17411
PV-1_33	13.33	45.89	2.05	0.754164	0.17411
PV-1_33	14.59	39.85	2.05	0.754164	0.17411
PV-1_34	11.83	31.03	1.73	0.759016	0.145859
PV-1_34	12.9	80.09	1.73	0.759016	0.145859
PV-1_37	12.17	44.92	1.46	0.749393	0.238578
PV-1_extra01	11.82	79.78	1.63	0.75386	0.175266
PV-1_extra01	12.89	80.04	1.63	0.75386	0.175266
PV-1_extra01	13.09	81	1.63	0.75386	0.175266
PV-1_extra02	13.31	37.53	1.42	0.74542	0.192611
PV-1_extra02	13.4	50.98	1.42	0.74542	0.192611
PV-1_extra06	12.48	37.01	1.71	0.742412	0.172665
PV-1_extra08	12.2	41.05	1.39	0.74931	0.196431
PV-1_extra09	9.96	70.98	1.84	0.758259	0.203047
PV-1_extra102	12.87	20.12	1.61	0.754737	0.207891
PV-1_extra102	13.78	31.91	1.61	0.754737	0.207891
PV-1_extra104	11.64	58.83	1.72	0.736458	0.170904
PV-1_extra104	12.16	65.64	1.72	0.736458	0.170904
PV-1_extra105	11.93	54.8	1.64	0.762333	0.192233
PV-1_extra11	10.5	60.18	1.27	0.765267	0.199773
PV-1_extra11	11.13	39.67	1.27	0.765267	0.199773
PV-1_extra110	9.82	68.89	1.85	0.746021	0.157092
PV-1_extra116	12.55	24.48	1.71	0.73777	0.189134
PV-1_extra118	10.18	59.18	1.76	0.760276	0.200089
PV-1_extra118	14.14	16.88	1.76	0.760276	0.200089
PV-1_extra120	9.82	61.68	1.94	0.75521	0.155598
PV-1_extra120	11.85	25.8	1.94	0.75521	0.155598
PV-1_extra13	11.71	59.99	1.73	0.761024	0.233877
PV-1_extra14	10.8	73.79	1.27	0.757876	0.186324
PV-1_extra15	11.13	80.91	1.72	0.769356	0.151221
PV-1_extra18	11.57	76.67	1.35	0.754586	0.10579
PV-1_extra20	11.35	40.87	1.36	0.765514	0.220103
PV-1_extra21	11.46	30.71	1.15	0.754836	0.215318
PV-1_extra23	11.21	78.49	1.38	0.757052	0.161118
PV-1_extra23	14.51	68.56	1.38	0.757052	0.161118
PV-1_extra24	14.55	52.91	1.62	0.758702	0.198985
PV-1_extra25	11.39	13.26	1.71	0.726848	0.226778
PV-1_extra26	12.52	37.05	1.42	0.753017	0.214021
PV-1_extra28	12.67	55.56	1.45	0.755038	0.213912
PV-1_extra30	12.89	77.9	1.39	0.740065	0.160443
PV-1_extra31	11.64	45.63	1.48	0.779179	0.182264
PV-1_extra31	13.07	59.67	1.48	0.779179	0.182264
PV-1_extra33	11.61	12.45	1.32	0.763287	0.190796
PV-1_extra33	11.72	44.63	1.75	0.760254	0.165222
PV-1_extra33	12.12	77.38	1.75	0.760254	0.165222
PV-1_extra33	12.64	76.38	1.32	0.763287	0.190796
PV-1_extra33	13.03	70.11	1.32	0.763287	0.190796
PV-1_extra33	13.15	77.84	1.32	0.763287	0.190796
PV-1_extra34	13.11	44.55	1.13	0.769037	0.092928
PV-1_extra34	13.52	57.96	1.6	0.755335	0.166031
PV-1_extra34	13.58	53.54	1.13	0.769037	0.092928
PV-1_extra34	13.63	79.23	1.6	0.755335	0.166031
PV-1_extra35	11.91	32.98	1.52	0.759163	0.171243
PV-1_extra35	13.89	35.5	1.52	0.759163	0.171243
PV-1_extra36	10.89	58.38	1.4	0.776678	0.182199
PV-1_extra40	11.01	43.44	1.44	0.764262	0.183366
PV-1_extra43	12.51	72.28	1.96	0.755382	0.166915
PV-1_extra43	12.58	73.54	1.96	0.755382	0.166915
PV-1_extra43	13.66	34.93	1.96	0.755382	0.166915
PV-1_extra61	11.7	72.92	1.69	0.739155	0.194273
PV-1_extra61	11.87	79.9	1.69	0.739155	0.194273
PV-1_extra63	12.99	12.05	1.44	0.755229	0.239386
PV-1_extra65	9.63	74.37	1.83	0.75745	0.193931
PV-1_extra69	11.24	72.66	1.77	0.770654	0.157386
PV-1_extra69	11.28	54.98	1.77	0.770654	0.157386
PV-1_extra72	9.03	52.59	1.47	0.752413	0.100963
PV-1_extra72	11.02	80.19	1.47	0.752413	0.100963
PV-1_extra72	15	49.84	1.47	0.752413	0.100963
PV-1_extra74	14.92	16.4	1.57	0.7456	0.244543
PV-1_extra77	10.85	62.24	1.78	0.770988	0.190862
PV-1_extra78	12.7	5.12	1.92	0.745081	0.205521
PV-1_extra78	13.66	79.66	1.92	0.745081	0.205521
PV-1_extra83	12.96	70.21	1.68	0.747143	0.222576
PV-1_extra83	13.93	83	1.68	0.747143	0.222576
PV-1_extra86	13.46	53.14	1.8	0.734002	0.165856
PV-1_extra90	11.21	64.48	1.69	0.759704	0.138068
PV-1_extra92	12.13	78.8	1.59	0.74715	0.142827
PV-1_extra92	12.41	38.94	1.59	0.74715	0.142827
PV-1_extra93	13.35	52.97	1.56
PV-1_extra95	11.17	48.88	1.78
PV-1_extra98	12.29	53.57	1.86	0.726794	0.171139
PV-1_extra98	12.96	57.4	1.86	0.726794	0.171139
PV-1_extra99	14.07	44.28	1.51	0.757581	0.101305
GV14JAW182_1	9.82	87.35	1.17	0.807194	0.066616
GV14JAW182_1	13.68	36.13	1.17	0.807194	0.066616
GV14JAW182_2	14.2	41.33	1.32	0.82865	0.061693
GV14JAW182_3	13.2	35.2	1.28	0.788835	0.037811
GV14JAW182_3	11.67	68.69	1.28	0.788835	0.037811
GV14JAW182_4	9.38	76.12	1.33	0.796605	0.087235
GV14JAW182_4	14.11	34.16	1.33	0.796605	0.087235
GV14JAW182_4	13.42	21.44	1.33	0.796605	0.087235
GV14JAW182_4	13.93	49.07	1.33	0.796605	0.087235
GV14JAW182_4	12.33	30.41	1.33	0.796605	0.087235
GV14JAW182_4	12.8	64.86	1.33	0.796605	0.087235
GV14JAW182_4	14.88	59.04	1.33	0.796605	0.087235
GV14JAW182_4	12.19	72.74	1.33	0.796605	0.087235
GV14JAW182_6	15.23	24.68	1.23	0.797645	0.182708
GV14JAW182_6	12.3	61.12	1.23	0.797645	0.182708
GV14JAW182_6	13.24	23.49	1.23	0.797645	0.182708
GV14JAW182_6	10.47	57.4	1.23	0.797645	0.182708
GV14JAW182_6	14.63	68.34	1.23	0.797645	0.182708
GV14JAW182_6	13.16	24.4	1.23	0.797645	0.182708
GV14JAW182_6	11.56	41.83	1.23	0.797645	0.182708
GV14JAW182_7	11.59	63.71	1.36	0.777356	0.104154
GV14JAW182_7	12.89	25.85	1.36	0.777356	0.104154
GV14JAW182_7	13.04	73.1	1.36	0.777356	0.104154
GV14JAW182_8	13.87	75.27	1.3	0.800903	0.058721
GV14JAW182_8	12.37	45.96	1.3	0.800903	0.058721
GV14JAW182_8	12.03	76.14	1.3	0.800903	0.058721
GV14JAW182_10	11.55	35.8	1.32	0.823112	0.045719
GV14JAW182_10	12.86	64	1.32	0.823112	0.045719
GV14JAW182_10	12.17	34.84	1.32	0.823112	0.045719
GV14JAW182_11	13.99	87.53	1.25	0.79263	0.058625
GV14JAW182_11	11.49	61.61	1.25	0.79263	0.058625
GV14JAW182_11	10.35	74.97	1.25	0.79263	0.058625
GV14JAW182_11	13.18	54.19	1.25	0.79263	0.058625
GV14JAW182_11	12.45	58.67	1.25	0.79263	0.058625
GV14JAW182_11	14.27	23.65	1.25	0.79263	0.058625
GV14JAW182_11	13.65	41.18	1.25	0.79263	0.058625
GV14JAW182_12	12.94	74.15	1.36	0.795754	0.077759
GV14JAW182_12	13.39	75.7	1.36	0.795754	0.077759
GV14JAW182_12	14.97	85.57	1.36	0.795754	0.077759
GV14JAW182_13	13.18	68.8	1.35	0.813264	0.076358
GV14JAW182_13	12.64	14.03	1.35	0.813264	0.076358
GV14JAW182_15	13.09	71.26	1.41	0.798449	0.058534
GV14JAW182_15	12.94	50.61	1.41	0.798449	0.058534
GV14JAW182_15	12.36	62.92	1.41	0.798449	0.058534
GV14JAW182_16	13.01	43.67	1.2	0.810097	0.056152
GV14JAW182_16	13	51.7	1.2	0.810097	0.056152
GV14JAW182_16	11.99	40.87	1.2	0.810097	0.056152
GV14JAW182_17	12.4	74.2	1.14	0.826314	0.047444
GV14JAW182_17	11.58	52.04	1.14	0.826314	0.047444
GV14JAW182_18	13.83	66.43	1.24	0.768736	0.093893
GV14JAW182_18	14.9	36.82	1.24	0.768736	0.093893
GV14JAW182_18	11.83	78.4	1.24	0.768736	0.093893
GV14JAW182_18	13.96	55.41	1.24	0.768736	0.093893
GV14JAW182_20	11.97	86.86	1.36	0.818421	0.089758
GV14JAW182_20	12.05	72.19	1.36	0.818421	0.089758
GV14JAW182_22	11.82	76.41	1.16	0.818134	0.034581
GV14JAW182_22	13.56	43.39	1.16	0.818134	0.034581
GV14JAW182_22	10.62	63.52	1.16	0.818134	0.034581
GV14JAW182_22	11.03	22.29	1.16	0.818134	0.034581
GV14JAW182_22	12.39	24.81	1.16	0.818134	0.034581
GV14JAW182_23	12.49	61.89	1.21	0.818811	0.049689
GV14JAW182_23	11.76	28.72	1.21	0.818811	0.049689
GV14JAW182_23	12.99	68.23	1.21	0.818811	0.049689
GV14JAW182_26	14.27	66.59	1.16	0.815315	0.069726
GV14JAW182_26	13.48	74.85	1.16	0.815315	0.069726
GV14JAW182_27	11.32	38.28	1.17	0.816425	0.059511
GV14JAW182_28	13.59	51.56	1.33	0.834178	0.058629
GV14JAW182_28	14.27	34.73	1.33	0.834178	0.058629
GV14JAW182_28	10.79	80.76	1.33	0.834178	0.058629
GV14JAW182_30	13.34	71.47	1.23	0.816641	0.030586
GV14JAW182_30	13.03	23.34	1.23	0.816641	0.030586
GV14JAW182_30	11.2	35.68	1.23	0.816641	0.030586
GV14JAW182_30	13.71	27.98	1.23	0.816641	0.030586
GV14JAW182_31	15.8	43.76	1.36	0.740636	0.140152
GV14JAW182_31	13.72	80.75	1.36	0.740636	0.140152
GV14JAW182_31	12.46	74.7	1.36	0.740636	0.140152
GV14JAW182_31	11.9	66.85	1.36	0.740636	0.140152
GV14JAW182_31	11.01	58.22	1.36	0.740636	0.140152
GV14JAW182_31	11.04	87.19	1.36	0.740636	0.140152
GV14JAW182_31	12.41	44.3	1.36	0.740636	0.140152
GV14JAW182_31	13.34	77.54	1.36	0.740636	0.140152
GV14JAW182_31	13.72	51.65	1.36	0.740636	0.140152
GV14JAW182_31	11.97	72.68	1.36	0.740636	0.140152
GV14JAW182_32	12.51	67.56	1.25	0.810192	0.087369
GV14JAW182_33	12.86	45.35	1.2	0.80676	0.057795
GV14JAW182_34	12.64	49.16	1.22	0.820677	0.057069
GV14JAW182_35	12.1	39.09	1.39	0.759406	0.145689
GV14JAW182_35	13.53	58.06	1.39	0.759406	0.145689
GV14JAW182_35	12.44	76.28	1.39	0.759406	0.145689
GV14JAW182_35	12.43	72.67	1.39	0.759406	0.145689
GV14JAW182_35	11.19	41.21	1.39	0.759406	0.145689
GV14JAW182_36	14.28	43.86	1.28	0.807602	0.061673
GV14JAW182_36	14.2	9.6	1.28	0.807602	0.061673
GV14JAW182_37	12.79	73.59	1.17	0.770241	0.084111
GV14JAW182_37	13.36	65.96	1.17	0.770241	0.084111
GV14JAW182_38	13.48	56.22	1.46	0.749523	0.127929
GV14JAW182_38	13.57	60.31	1.46	0.749523	0.127929
GV14JAW182_38	10.43	67.64	1.46	0.749523	0.127929
GV14JAW182_38	13.11	80.67	1.46	0.749523	0.127929
GV14JAW182_40	9.63	73.59	1.31	0.798356	0.052975
GV14JAW182_40	11.99	45.34	1.31	0.798356	0.052975
GV14JAW182_40	12.14	54.74	1.31	0.798356	0.052975
GV14JAW183_2	13.69	39.42	1.57	0.822585	0.006546
GV14JAW183_2	11.11	50.57	1.57	0.822585	0.006546
GV14JAW183_2	11.78	38.23	1.57	0.822585	0.006546
GV14JAW183_2	9.86	63.16	1.57	0.822585	0.006546
GV14JAW183_2	11.23	67.12	1.57	0.822585	0.006546
GV14JAW183_5	13.82	30.22	1.46	0.842572	0.012203
GV14JAW183_5	11.13	46.74	1.46	0.842572	0.012203
GV14JAW183_5	11.93	41.18	1.46	0.842572	0.012203
GV14JAW183_6	9.97	32.83	1.65
GV14JAW183_7	13.6	76.6	1.7	0.821728	0.003423
GV14JAW183_7	12.95	39.69	1.7	0.821728	0.003423
GV14JAW183_7	11.47	64.81	1.7	0.821728	0.003423
GV14JAW183_8	14.62	34.59	1.82
GV14JAW183_8	14.13	22.46	1.82
GV14JAW183_8	12.62	26.03	1.82
GV14JAW183_8	13.31	43.97	1.82
GV14JAW183_8	13.13	26.37	1.82
GV14JAW183_8	13.59	66.74	1.82
GV14JAW183_8	12.12	87.51	1.82
GV14JAW183_8	12.53	30.59	1.82
GV14JAW183_8	11.53	38.96	1.82
GV14JAW183_9	13.7	70.98	1.96	0.833389	0.011288
GV14JAW183_9	10.43	82.72	1.96	0.833389	0.011288
GV14JAW183_9	14.01	49.82	1.96	0.833389	0.011288
GV14JAW183_9	13.71	36.98	1.96	0.833389	0.011288
GV14JAW183_10	11.6	74.81	1.94
GV14JAW183_10	13	10.04	1.94
GV14JAW183_10	12.83	32.71	1.94
GV14JAW183_10	11.87	80.45	1.94
GV14JAW183_10	13.82	71.33	1.94
GV14JAW183_10	12.58	53.75	1.94
GV14JAW183_11	12.35	18.93	1.19
GV14JAW183_11	12.35	69.3	1.19
AB14JAW004_1	12.48	60.38	1.35	0.605744	0.028153
AB14JAW004_1	11.2	73.34	1.35	0.605744	0.028153
AB14JAW004_1	13.46	29.94	1.35	0.605744	0.028153
AB14JAW004_2	13.49	50.96	1.46	0.683678	0.038722
AB14JAW004_2	14.18	52.03	1.46	0.683678	0.038722
AB14JAW004_3	12.91	60.06	1.32	0.801891	0.034652
AB14JAW004_3	12.24	65.73	1.32	0.801891	0.034652
AB14JAW004_4	15.12	80.68	1.43	0.691312	0.046769
AB14JAW004_4	13.89	65.34	1.43	0.691312	0.046769
AB14JAW004_5	15.75	71.88	1.41	0.725945	0.028281
AB14JAW004_5	13.75	78.23	1.41	0.725945	0.028281
AB14JAW004_5	15.27	45.38	1.41	0.725945	0.028281
AB14JAW004_5	14.41	49.77	1.41	0.725945	0.028281
AB14JAW004_5	12.97	77.68	1.41	0.725945	0.028281
AB14JAW004_5	13.04	67.78	1.41	0.725945	0.028281
AB14JAW004_5	12.81	81.61	1.41	0.725945	0.028281
AB14JAW004_5	12.64	77.38	1.41	0.725945	0.028281
AB14JAW004_5	12.74	73.47	1.41	0.725945	0.028281
AB14JAW004_6	13.06	68.93	1.37	0.728909	0.030844
AB14JAW004_6	13.11	81.19	1.37	0.728909	0.030844
AB14JAW004_6	13.55	42.41	1.37	0.728909	0.030844
AB14JAW004_6	13.08	65.04	1.37	0.728909	0.030844
AB14JAW004_7	12.69	33.34	1.47	0.678179	0.012218
AB14JAW004_7	13	76.28	1.47	0.678179	0.012218
AB14JAW004_7	11.76	69.89	1.47	0.678179	0.012218
AB14JAW004_8	13.66	44.94	1.34	0.719973	0.012185
AB14JAW004_8	14.3	78.06	1.34	0.719973	0.012185
AB14JAW004_8	12.94	38.11	1.34	0.719973	0.012185
AB14JAW004_8	10.91	58.78	1.34	0.719973	0.012185
AB14JAW004_9	11.93	59.71	1.34	0.738622	0.030477
AB14JAW004_9	12.99	79.69	1.34	0.738622	0.030477
AB14JAW004_9	13.35	73.98	1.34	0.738622	0.030477
AB14JAW004_9	12.55	78.09	1.34	0.738622	0.030477
AB14JAW004_10	12.01	56.44	1.46	0.621565	0.057726
AB14JAW004_10	12.26	76.1	1.46	0.621565	0.057726
AB14JAW004_10	11.21	26.65	1.46	0.621565	0.057726
AB14JAW004_11	12.03	50.86	1.54	0.704128	0.017089
AB14JAW004_13	13.91	35.65	1.43	0.730691	0.034621
AB14JAW004_13	14.63	65.57	1.43	0.730691	0.034621
AB14JAW004_13	11.33	74.67	1.43	0.730691	0.034621
AB14JAW004_13	13.5	56.72	1.43	0.730691	0.034621
AB14JAW004_13	14.13	55.08	1.43	0.730691	0.034621
AB14JAW004_13	12.37	52.19	1.43	0.730691	0.034621
AB14JAW004_14	12.04	49.4	1.15	0.699194	0.045831
AB14JAW004_15	10.09	86.87	1.53	0.626395	0.04905
AB14JAW004_15	13.71	67.39	1.53	0.626395	0.04905
AB14JAW004_15	10.09	59.95	1.53	0.626395	0.04905
AB14JAW004_15	13.43	63.04	1.53	0.626395	0.04905
AB14JAW004_15	13.42	85.63	1.53	0.626395	0.04905
AB14JAW004_15	11.58	49.11	1.53	0.626395	0.04905
AB14JAW004_16	14.34	43.66	1.26	0.715853	0.010513
AB14JAW004_16	12.47	32.32	1.26	0.715853	0.010513
AB14JAW004_16	9.11	30.46	1.26	0.715853	0.010513
AB14JAW004_17	13.22	22.25	1.43	0.682918	0.113818
AB14JAW004_18	13.57	3.88	1.39	0.695076	0.032982
AB14JAW004_18	13.12	55.12	1.39	0.695076	0.032982
AB14JAW004_19	13.27	66.5	1.37	0.688984	0.050626
AB14JAW004_20	11.67	68.32	1.29	0.70098	0.019394
AB14JAW004_20	14.41	33.38	1.29	0.70098	0.019394
AB14JAW004_21	13.17	52.95	1.37	0.683782	0.072921
AB14JAW004_21	11.08	64.71	1.37	0.683782	0.072921
AB14JAW004_22	11.9	84.45	1.34	0.708374	0.020162
AB14JAW004_23	15.1	57.1	1.39
AB14JAW004_23	13.9	32.42	1.39
AB14JAW004_23	9.18	46.81	1.39
AB14JAW004_23	13.45	74.43	1.39
AB14JAW004_23	14.34	27.12	1.39
AB14JAW004_23	13.14	48.61	1.39
AB14JAW004_23	12.43	64.11	1.39
AB14JAW004_23	12.72	66.41	1.39
AB14JAW004_24	13.49	53.47	1.42	0.701034	0.033036
AB14JAW004_24	13.36	21.79	1.42	0.701034	0.033036
AB14JAW004_24	12.35	54.31	1.42	0.701034	0.033036
AB14JAW004_27	12.14	63.61	1.41	0.687963	0.005145
AB14JAW004_27	13.5	50.6	1.41	0.687963	0.005145
AB14JAW004_27	12.19	81.75	1.41	0.687963	0.005145
AB14JAW004_28	13.82	58.59	1.52	0.558918	0.148013
AB14JAW004_29	12.24	76.98	1.28	0.711222	0.031416
AB14JAW004_30	12.7	75.33	1.44	0.690927	0.043436
AB14JAW004_30	13.91	27.82	1.44	0.690927	0.043436
AB14JAW004_30	13.27	77.06	1.44	0.690927	0.043436
AB14JAW004_31	13.94	56.44	1.44	0.675653	0.015385
AB14JAW004_31	9.67	35.8	1.44	0.675653	0.015385
AB14JAW004_32	13.69	25.59	1.47	0.619564	0.071285
AB14JAW004_33	13.92	73.4	1.38	0.682053	0.034662
AB14JAW004_33	13.31	62.85	1.38	0.682053	0.034662
AB14JAW004_33	12.37	64.17	1.38	0.682053	0.034662
AB14JAW004_33	13.6	56.39	1.38	0.682053	0.034662
AB14JAW004_33	15.05	51.26	1.38	0.682053	0.034662
AB14JAW004_33	14.32	42.75	1.38	0.682053	0.034662
AB14JAW004_34	14.02	41.56	1.37	0.681785	0.045009
AB14JAW004_34	12.99	65.15	1.37	0.681785	0.045009
AB14JAW004_35	14.01	51.23	1.47	0.746851	0.023452
AB14JAW004_36	14.79	61.13	1.36	0.699145	0.032145
AB14JAW004_36	10.02	66.34	1.36	0.699145	0.032145
AB14JAW004_36	12.6	78.43	1.36	0.699145	0.032145
AB14JAW004_37	8.9	75.78	1.38	0.712664	0.03051
AB14JAW004_37	13.97	54.11	1.38	0.712664	0.03051
AB14JAW004_37	11.48	63.31	1.38	0.712664	0.03051
AB14JAW004_38	12.86	69.91	1.3	0.730779	0.040985
AB14JAW004_38	14	78.49	1.3	0.730779	0.040985
AB14JAW004_39	10.86	63.45	1.39	0.674152	0.028943
AB14JAW004_39	13.57	72.42	1.39	0.674152	0.028943
AB14JAW004_39	14.57	54.09	1.39	0.674152	0.028943
AB14JAW004_40	13.97	36.83	1.36	0.694806	0.018624
GV14SKR033_3	13.55	24.64	1.27	0.707774	0.165548
GV14SKR033_3	11.55	83.12	1.27	0.707774	0.165548
GV14SKR033_3	12.62	55.75	1.27	0.707774	0.165548
GV14SKR033_3	12.84	72.94	1.27	0.707774	0.165548
GV14SKR033_3	12.41	80.01	1.27	0.707774	0.165548
GV14SKR033_3	12.22	59.18	1.27	0.707774	0.165548
GV14SKR033_3	12.27	61.23	1.27	0.707774	0.165548
GV14SKR033_4	12.95	78.12	1.79	0.647636	0.167834
GV14SKR033_4	14.95	59.7	1.79	0.647636	0.167834
GV14SKR033_4	12.89	78.31	1.79	0.647636	0.167834
GV14SKR033_4	13.15	68.32	1.79	0.647636	0.167834
GV14SKR033_4	14.36	73.38	1.79	0.647636	0.167834
GV14SKR033_4	12.19	68.32	1.79	0.647636	0.167834
GV14SKR033_7	14.16	56.22	1.5	0.809384	0.314042
GV14SKR033_10	12.16	81.74	1.05	0.841287	0.124768
GV14SKR033_12	13.79	48.54	1.67	0.641276	0.261341
GV14SKR033_12	12.88	73.7	1.67	0.641276	0.261341
GV14SKR033_12	12.22	44.98	1.67	0.641276	0.261341
GV14SKR033_12	13.31	53.59	1.67	0.641276	0.261341
GV14SKR033_15	12.81	81.83	1.81		0.270621
GV14SKR033_15	14.59	56.12	1.81		0.270621
GV14SKR033_15	12.48	43.42	1.81		0.270621
GV14SKR033_16	13.16	16.7	1.47		0.338676
GV14SKR033_17	11.85	86.25	1.44		0.275521
GV14SKR033_17	14.33	74.96	1.44		0.275521
GV14SKR033_17	13.89	27.71	1.44		0.275521
GV14SKR033_17	13.26	67.34	1.44		0.275521
GV14SKR033_17	13.97	77.41	1.44		0.275521
GV14SKR033_18	11.85	53.35	1.56		0.21003
GV14SKR033_18	12.69	54.95	1.56		0.21003
GV14SKR033_18	13.47	77.32	1.56		0.21003
GV14SKR033_18	13.94	30.47	1.56		0.21003
GV14SKR033_18	12.36	27.21	1.56		0.21003
GV14SKR033_21	12.24	34.12	1.25	0.739477	0.319496
GV14SKR033_28	12.69	79.76	1.65	0.835219	0.107775
GV14SKR033_30	14.86	34.71	1.64	0.83219	0.128948
GV14SKR033_31	11.62	39.54	1.59	0.806273	0.08239
GV14SKR033_31	13.4	56.58	1.59	0.806273	0.08239
GV14SKR033_32	12.53	57.55	1.62	0.737835	0.13974
GV14SKR033_32	13.65	81.92	1.62	0.737835	0.13974
GV14SKR033_32	14.22	69.4	1.62	0.737835	0.13974
GV14SKR033_32	12.97	47.75	1.62	0.737835	0.13974
GV14SKR033_32	13.42	83.92	1.62	0.737835	0.13974
GV14SKR033_32	13.89	70.98	1.62	0.737835	0.13974
GV14SKR033_32	12.49	71.43	1.62	0.737835	0.13974
GV14SKR033_32	13.09	67.24	1.62	0.737835	0.13974
GV14SKR033_32	12.68	52.76	1.62	0.737835	0.13974
GV14SKR033_32	11.64	49.9	1.62	0.737835	0.13974
GV14SKR033_32	11.31	85.5	1.62	0.737835	0.13974
GV14SKR033_37	14.11	22.73	1.67	0.712434	0.212558
GV14SKR033_37	13.96	66.98	1.67	0.712434	0.212558
GV14SKR033_37	13.7	54.6	1.67	0.712434	0.212558
GV14SKR033_40	15.01	32.22	1.58	0.673429	0.171832
GV14SKR033_40	12.59	88.05	1.58	0.673429	0.171832
GV14SKR033_40	14.27	57.82	1.58	0.673429	0.171832
GV14SKR033_40	14.19	71.11	1.58	0.673429	0.171832
GV14SKR033_40	14.33	58.68	1.58	0.673429	0.171832
GV14SKR033_42	13.41	77.03	1.53	0.676355	0.266817
GV14SKR033_43	13.26	61.52	1.53		0.158289
GV14SKR033_48	13.42	83.49	1.72		0.163027
GV14SKR033_48	12.53	60	1.72		0.163027
GV14SKR033_48	13.9	20.66	1.72		0.163027
GV14SKR033_48	13.46	70.49	1.72		0.163027
GV14SKR033_48	11.75	52.81	1.72		0.163027
GV15JAW261_1	13.89	76.07	1.63	0.828454	0.164037
GV15JAW261_1	14.32	37.38	1.63	0.828454	0.164037
GV15JAW261_1	12.45	72.52	1.63	0.828454	0.164037
GV15JAW261_1	11.53	35.84	1.63	0.828454	0.164037
GV15JAW261_1	12.6	58.79	1.63	0.828454	0.164037
GV15JAW261_1	13.79	69.29	1.63	0.828454	0.164037
GV15JAW261_1	12.66	85.21	1.63	0.828454	0.164037
GV15JAW261_1	14.17	35.26	1.63	0.828454	0.164037
GV15JAW261_2	13.21	72.64	1.51	0.829101	0.133611
GV15JAW261_2	12.35	62.26	1.51	0.829101	0.133611
GV15JAW261_2	12.47	45.59	1.51	0.829101	0.133611
GV15JAW261_2	12.75	64.79	1.51	0.829101	0.133611
GV15JAW261_2	12.84	83.56	1.51	0.829101	0.133611
GV15JAW261_2	13.61	56.4	1.51	0.829101	0.133611
GV15JAW261_3	12.46	45.51	1.48	0.846497	0.093337
GV15JAW261_3	11.59	65.35	1.48	0.846497	0.093337
GV15JAW261_3	12.11	76.14	1.48	0.846497	0.093337
GV15JAW261_3	11.93	80.59	1.48	0.846497	0.093337
GV15JAW261_3	13.37	82.01	1.48	0.846497	0.093337
GV15JAW261_3	11.88	38.61	1.48	0.846497	0.093337
GV15JAW261_3	12.67	77.12	1.48	0.846497	0.093337
GV15JAW261_3	13.38	79.14	1.48	0.846497	0.093337
GV15JAW261_3	12.95	88.98	1.48	0.846497	0.093337
GV15JAW261_3	14.32	40.41	1.48	0.846497	0.093337
GV15JAW261_3	14.59	35.46	1.48	0.846497	0.093337
GV15JAW261_3	12.52	83.94	1.48	0.846497	0.093337
GV15JAW261_3	10.52	74.86	1.48	0.846497	0.093337
GV15JAW261_4	14.05	40.73	1.39	0.844571	0.163139
GV15JAW261_4	13.44	58.79	1.39	0.844571	0.163139
GV15JAW261_5	12.11	20.76	1.49	0.836573	0.158101
GV15JAW261_5	13.46	53.66	1.49	0.836573	0.158101
GV15JAW261_5	12.79	61.89	1.49	0.836573	0.158101
GV15JAW261_6	13.89	74.14	1.42	0.839474	0.13987
GV15JAW261_6	12.97	53.98	1.42	0.839474	0.13987
GV15JAW261_7	12.57	76.93	1.45	0.833128	0.116538
GV15JAW261_7	12.76	79.91	1.45	0.833128	0.116538
GV15JAW261_7	12.6	59.24	1.45	0.833128	0.116538
GV15JAW261_7	12.88	73.76	1.45	0.833128	0.116538
GV15JAW261_7	11.63	87.66	1.45	0.833128	0.116538
GV15JAW261_7	13.97	36.21	1.45	0.833128	0.116538
GV15JAW261_7	11.86	33.41	1.45	0.833128	0.116538
GV15JAW261_8	13.61	78.72	1.5	0.820158	0.178963
GV15JAW261_8	13.13	50.69	1.5	0.820158	0.178963
GV15JAW261_8	13.34	89.29	1.5	0.820158	0.178963
GV15JAW261_8	12.87	64.06	1.5	0.820158	0.178963
GV15JAW261_8	13.97	38.42	1.5	0.820158	0.178963
GV15JAW261_8	10.16	70.87	1.5	0.820158	0.178963
GV15JAW261_9	14.19	62.65	1.49	0.824684	0.161511
GV15JAW261_9	15.05	13.89	1.49	0.824684	0.161511
GV15JAW261_9	12.23	61.87	1.49	0.824684	0.161511
GV15JAW261_9	13.39	35.68	1.49	0.824684	0.161511
GV15JAW261_9	13.81	40.18	1.49	0.824684	0.161511
GV15JAW261_9	12.51	54.46	1.49	0.824684	0.161511
GV15JAW261_10	13.7	36.44	1.45	0.83039	0.154293
GV15JAW261_10	14.12	27.31	1.45	0.83039	0.154293
GV15JAW261_10	13.89	56.27	1.45	0.83039	0.154293
GV15JAW261_10	12.93	73.55	1.45	0.83039	0.154293
GV15JAW261_10	13.7	58.47	1.45	0.83039	0.154293
GV15JAW261_11	14.34	62.84	1.51	0.846231	0.144586
GV15JAW261_12	14.53	45.81	1.45	0.838133	0.120442
GV15JAW261_12	11.81	58.33	1.45	0.838133	0.120442
GV15JAW261_12	13.06	35.68	1.45	0.838133	0.120442
GV15JAW261_12	11.92	84.66	1.45	0.838133	0.120442
GV15JAW261_12	10.36	87.81	1.45	0.838133	0.120442
GV15JAW261_12	12.28	35.45	1.45	0.838133	0.120442
GV15JAW261_12	9.7	71.74	1.45	0.838133	0.120442
GV15JAW261_13	14.36	17.31	1.45	0.845528	0.130981
GV15JAW261_13	13.71	30.91	1.45	0.845528	0.130981
GV15JAW261_14	12.25	57.2	1.5	0.82776	0.137379
GV15JAW261_14	14.46	34.1	1.5	0.82776	0.137379
GV15JAW261_14	13.18	37.06	1.5	0.82776	0.137379
GV15JAW261_14	13.29	82.33	1.5	0.82776	0.137379
GV15JAW261_14	13.29	70.88	1.5	0.82776	0.137379
GV15JAW261_14	13.9	79.6	1.5	0.82776	0.137379
GV15JAW261_14	13.12	69.67	1.5	0.82776	0.137379
GV15JAW261_15	10.26	67.24	1.53	0.842468	0.156718
GV15JAW261_15	12.24	49.14	1.53	0.842468	0.156718
GV15JAW261_15	10.37	68.45	1.53	0.842468	0.156718
GV15JAW261_15	13.38	84.71	1.53	0.842468	0.156718
GV15JAW261_15	11.79	86.79	1.53	0.842468	0.156718
GV15JAW261_15	12.96	53.58	1.53	0.842468	0.156718
GV15JAW261_16	13.3	82.75	1.47	0.836185	0.161421
GV15JAW261_16	15.69	29.52	1.47	0.836185	0.161421
GV15JAW261_16	13.17	50.76	1.47	0.836185	0.161421
GV15JAW261_16	13.28	82.74	1.47	0.836185	0.161421
GV15JAW261_16	13.74	67.63	1.47	0.836185	0.161421
GV15JAW261_16	13.1	38.36	1.47	0.836185	0.161421
GV15JAW261_17	13.16	76.03	1.47	0.834549	0.12629
GV15JAW261_17	12.79	62.19	1.47	0.834549	0.12629
GV15JAW261_17	14.4	35.28	1.47	0.834549	0.12629
GV15JAW261_17	12.95	84.6	1.47	0.834549	0.12629
GV15JAW261_17	16.04	65.87	1.47	0.834549	0.12629
GV15JAW261_17	10.77	66.21	1.47	0.834549	0.12629
GV15JAW261_17	12.22	62.77	1.47	0.834549	0.12629
GV15JAW261_18	13.32	62.45	1.44	0.842661	0.151819
GV15JAW261_18	12.27	36.68	1.44	0.842661	0.151819
GV15JAW261_18	13.67	41.13	1.44	0.842661	0.151819
GV15JAW261_19	12.51	60.36	1.57	0.811	0.188477
GV15JAW261_19	11.93	45.44	1.57	0.811	0.188477
GV15JAW261_21	12.42	33.69	1.48	0.829883	0.129469
GV15JAW261_21	14	30.33	1.48	0.829883	0.129469
GV15JAW261_21	15.12	72.32	1.48	0.829883	0.129469
GV15JAW261_21	11.8	31.63	1.48	0.829883	0.129469
GV15JAW261_22	13.37	62.9	1.46	0.834918	0.129498
GV15JAW261_22	12.77	54.03	1.46	0.834918	0.129498
GV15JAW261_22	13.48	66.5	1.46	0.834918	0.129498
GV15JAW261_23	13.27	78.69	1.57	0.827935	0.147171
GV15JAW261_24	11.45	74.16	1.56	0.833788	0.122871
GV15JAW261_24	11.79	39.75	1.56	0.833788	0.122871
GV15JAW261_24	14.42	20.41	1.56	0.833788	0.122871
GV15JAW261_24	11.91	74.09	1.56	0.833788	0.122871
GV15JAW261_26	13.01	43.62	1.45	0.839457	0.128117
GV15JAW261_26	11.83	44.53	1.45	0.839457	0.128117
GV15JAW261_26	11.54	28.07	1.45	0.839457	0.128117
GV15JAW261_27	11.57	59.31	1.48	0.821666	0.129455
GV15JAW261_27	11.83	38.7	1.48	0.821666	0.129455
GV15JAW261_27	13.92	25.34	1.48	0.821666	0.129455
GV15JAW261_27	14.16	43.16	1.48	0.821666	0.129455
GV15JAW261_27	12.07	72.37	1.48	0.821666	0.129455
GV15JAW261_28	13.41	52.36	1.44	0.839915	0.168623
GV15JAW261_28	12	48	1.44	0.839915	0.168623
GV15JAW261_29	13.18	84.54	1.51	0.836026	0.135919
GV15JAW261_29	12.31	56.08	1.51	0.836026	0.135919
GV15JAW261_29	13.44	50.82	1.51	0.836026	0.135919
GV15JAW261_30	14.44	15.6	1.41	0.825234	0.116641
GV15JAW261_30	13.35	79.67	1.41	0.825234	0.116641
GV15JAW261_30	11.52	85.12	1.41	0.825234	0.116641
GV15JAW261_31	12.3	68.33	1.55	0.829536	0.173486
GV15JAW261_31	12.95	72.07	1.55	0.829536	0.173486
GV15JAW261_31	12.82	64.49	1.55	0.829536	0.173486
GV15JAW261_32	12.14	62.87	1.36	0.835252	0.17897
GV15JAW261_32	12.17	32.14	1.36	0.835252	0.17897
GV15JAW261_33	13.93	55.18	1.31	0.823819	0.127739
GV15JAW261_33	12.08	25.37	1.31	0.823819	0.127739
GV15JAW261_33	14.48	55.6	1.31	0.823819	0.127739
GV15JAW261_34	11.35	61.59	1.56	0.825445	0.165505
GV15JAW261_35	13.32	46.04	1.52	0.844272	0.126995
GV15JAW261_35	13.33	50.82	1.52	0.844272	0.126995
GV15JAW261_35	12.54	57.27	1.52	0.844272	0.126995
GV15JAW261_36	11.59	46.85	1.49	0.837038	0.145433
GV15JAW261_37	13.41	36.59	1.51	0.833712	0.136115
GV15JAW261_37	13.2	51.97	1.51	0.833712	0.136115
GV15JAW261_37	13.59	10.34	1.51	0.833712	0.136115
GV15JAW261_38	12.92	65.8	1.62	0.840818	0.155624
GV15JAW261_38	13.36	60.63	1.62	0.840818	0.155624
GV15JAW261_38	13.85	48.93	1.62	0.840818	0.155624
GV15JAW261_39	11.47	63.76	1.41	0.833852	0.180441
GV15JAW261_39	13.29	72.11	1.41	0.833852	0.180441
BM16JAW070_1	13.68	60	1.77		0.067691
BM16JAW070_1	14.61	71.63	1.77		0.067691
BM16JAW070_1	15.45	83.43	1.77		0.067691
BM16JAW070_2	14.02	62.14	2.38		0.076541
BM16JAW070_2	14.06	37.72	2.38		0.076541
BM16JAW070_2	15.98	60.77	2.38		0.076541
BM16JAW070_2	10.68	77.21	2.38		0.076541
BM16JAW070_2	15.04	60.81	2.38		0.076541
BM16JAW070_2	14.38	83.82	2.38		0.076541
BM16JAW070_2	12.67	79.9	2.38		0.076541
BM16JAW070_2	14.3	44.72	2.38		0.076541
BM16JAW070_2	12.81	37.7	2.38		0.076541
BM16JAW070_2	13.93	34.81	2.38		0.076541
BM16JAW070_3	11.89	26.73	2.4
BM16JAW070_3	12.63	66.36	2.4
BM16JAW070_3	13.34	40.84	2.4
BM16JAW070_4	13.01	55.08	2.17		0.040357
BM16JAW070_4	14.16	43.59	2.17		0.040357
BM16JAW070_4	13.33	63.31	2.17		0.040357
BM16JAW070_4	12.79	70.01	2.17		0.040357
BM16JAW070_4	12.42	38.95	2.17		0.040357
BM16JAW070_4	8.16	68.76	2.17		0.040357
BM16JAW070_4	14.59	49.87	2.17		0.040357
BM16JAW070_4	13.93	63.82	2.17		0.040357
BM16JAW070_4	11.83	68.8	2.17		0.040357
BM16JAW070_4	12.7	36.87	2.17		0.040357
BM16JAW070_4	9.67	53.35	2.17		0.040357
BM16JAW070_4	11.18	68.5	2.17		0.040357
BM16JAW070_4	12.63	76.5	2.17		0.040357
BM16JAW070_4	13.07	30.75	2.17		0.040357
BM16JAW070_4	11.7	57.53	2.17		0.040357
BM16JAW070_4	12.98	89.32	2.17		0.040357
BM16JAW070_4	12.47	65.6	2.17		0.040357
BM16JAW070_4	14.62	17.61	2.17		0.040357
BM16JAW070_4	13.77	83.25	2.17		0.040357
BM16JAW070_4	11.73	88.23	2.17		0.040357
BM16JAW070_5	12.36	53.35	2.23
BM16JAW070_5	9.91	74.29	2.23
BM16JAW070_5	12.29	55.36	2.23
BM16JAW070_5	11.73	66.43	2.23
BM16JAW070_5	13.03	88.43	2.23
BM16JAW070_7	12.29	69.53	1.87		0.045365
BM16JAW070_7	11.97	37.1	1.87		0.045365
BM16JAW070_7	12.41	86.63	1.87		0.045365
BM16JAW070_7	13.44	22.67	1.87		0.045365
BM16JAW070_7	9.68	59.66	1.87		0.045365
BM16JAW070_7	13.48	36.94	1.87		0.045365
BM16JAW070_7	12.97	41.94	1.87		0.045365
BM16JAW070_7	12.94	32.35	1.87		0.045365
BM16JAW070_8	13.16	37.93	2.52
BM16JAW070_8	12.98	53.45	2.52
BM16JAW070_8	14.12	62.46	2.52
BM16JAW070_9	13.67	65.35	2.24		0.033173
BM16JAW070_9	12.6	83.9	2.24		0.033173
BM16JAW070_9	13.05	46.77	2.24		0.033173
BM16JAW070_9	13.1	24.03	2.24		0.033173
BM16JAW070_9	14.14	59	2.24		0.033173
BM16JAW070_9	13.91	33.56	2.24		0.033173
BM16JAW070_10	11.92	47.27	2.79
BM16JAW070_10	11.98	64.87	2.79
BM16JAW070_12	14.32	74.69	1.88		0.073498
BM16JAW070_12	8.05	34.44	1.88		0.073498
BM16JAW070_12	12.49	45.53	1.88		0.073498
BM16JAW070_12	13.47	47.36	1.88		0.073498
BM16JAW070_13	12.44	76.37	1.68		0.058933
BM16JAW070_13	13.84	25.61	1.68		0.058933
BM16JAW070_13	12.44	29.44	1.68		0.058933
BM16JAW070_13	13.37	40.94	1.68		0.058933
BM16JAW070_13	13.85	50.39	1.68		0.058933
BM16JAW070_13	13.28	44.24	1.68		0.058933
BM16JAW070_13	13.41	52.04	1.68		0.058933
BM16JAW070_13	14.87	29.68	1.68		0.058933
BM16JAW070_15	11.71	24.49	1.85		0.058139
BM16JAW070_15	13.65	45.7	1.85		0.058139
BM16JAW070_15	12.97	45.08	1.85		0.058139
BM16JAW070_16	12.73	84.15	1.7		0.058172
BM16JAW070_16	12.76	53.26	1.7		0.058172
BM16JAW070_16	14.23	80.39	1.7		0.058172
BM16JAW070_17	11.91	80.04	1.87
BM16JAW070_17	13.26	71.27	1.87
BM16JAW070_17	14.76	23.73	1.87
BM16JAW070_18	15.94	64.5	2.14
BM16JAW070_18	9.54	58.14	2.14
BM16JAW070_18	13.34	41.46	2.14
BM16JAW070_18	13.32	44.21	2.14
BM16JAW070_19	14.93	9.13	1.61
BM16JAW070_19	13.9	64.4	1.61
BM16JAW070_19	11.37	80.63	1.61
BM16JAW070_19	12.24	82.67	1.61
BM16JAW070_19	13.91	8.62	1.61
BM16JAW070_19	13.26	68.2	1.61
BM16JAW070_19	13.19	35.91	1.61
BM16JAW070_19	13.88	29.35	1.61
BM16JAW070_20	13.11	59.92	2.23
BM16JAW070_20	13.42	46.35	2.23
BM16JAW070_21	13.45	55.13	2.62
BM16JAW070_21	14.19	29.11	2.62
BM16JAW070_22	14.08	41.93	1.97		0.04851
BM16JAW070_22	9.24	27.88	1.97		0.04851
BM16JAW070_23	12.83	49.9	2.29
BM16JAW070_23	13.88	46.34	2.29
BM16JAW070_23	13.12	71.51	2.29
BM16JAW070_25	11.46	83.92	2.51		0.047722
BM16JAW070_25	15.37	43.49	2.51		0.047722
BM16JAW070_30	15.77	18.86	2.79
BM16JAW070_31	13.42	71.78	2.45
BM16JAW070_36	13.48	21.47	2.12
BM16JAW070_36	11.88	79.51	2.12
BM16JAW070_36	12.26	62.9	2.12
BM16JAW070_36	12.73	74.44	2.12
BM16JAW070_36	12.56	65.5	2.12
BM16JAW070_36	13.58	7.75	2.12
BM16JAW070_37	11.17	73.96	2.45
BM16JAW070_37	12.62	41.46	2.45
BM16JAW070_38	12.36	63.52	2.83		0.115925
BM16JAW070_38	13.9	47.4	2.83		0.115925
BM16JAW070_40	12.77	36.87	2.08		0.046057
BM16JAW070_40	12.01	46.66	2.08		0.046057
BM16JAW070_40	14.22	87.15	2.08		0.046057
BM16JAW070_40	13.19	35.65	2.08		0.046057
BM16JAW070_40	14.41	69.66	2.08		0.046057
BM16JAW070_40	11.95	82.48	2.08		0.046057
BM16JAW070_40	12.35	50.25	2.08		0.046057
BM16JAW070_40	13.84	13.04	2.08		0.046057
BM16JAW070_41	13.24	3.39	2.23		0.055648
BM16JAW070_42	12.73	81.45	1.8
BM16JAW070_43	12.6	37.01	1.83		0.032473
BM16JAW070_43	13.79	54.25	1.83		0.032473
BM16JAW070_43	12.98	22.07	1.83		0.032473
BM16JAW070_43	11.03	59	1.83		0.032473
